# Supplementary material for: Millennial-scale variations of sedimentary oxygenation in the western subtropical North Pacific and its links to the North Atlantic climate
Source: Copernicus journal article supplement (doi:10.5194/cp-2019-70), 2019-06-20
Supplement: Supplementary file [file Supplement 1 track changes.pdf › Supplement 1 track changes.pdf]

1 **Millennial-scale variations of sedimentary oxygenation in the western**  
2 **subtropical North Pacific and its links to the North Atlantic climate**

3  
4 Jianjun Zou<sup>1,2</sup>, Xuefa Shi<sup>1,2</sup>, Aimei Zhu<sup>1</sup>, Selvaraj Kandasamy<sup>3</sup>, Xun Gong<sup>4</sup>, Lester  
5 Lembke-Jene<sup>4</sup>, Min-Te Chen<sup>5</sup>, Yonghua Wu<sup>1,2</sup>, Shulan Ge<sup>1,2</sup>, Yanguang Liu<sup>1,2</sup>, Xinru  
6 Xue<sup>1</sup>, Gerrit Lohmann<sup>4</sup>, Ralf Tiedemann<sup>4</sup>

7 <sup>1</sup>Key Laboratory of Marine Sedimentology and Environmental Geology, First Institute  
8 of Oceanography, MNR, Qingdao 266061, China

9 <sup>2</sup>Laboratory for Marine Geology, Qingdao National Laboratory for Marine Science  
10 and Technology, Qingdao, 266061, China

11 <sup>3</sup>Department of Geological Oceanography and State Key Laboratory of Marine  
12 Environmental Science, Xiamen University, Xiamen361102, China

13 <sup>4</sup>Alfred-Wegener-Institut Helmholtz-Zentrum für Polar- und Meeresforschung,  
14 Bussestr. 24, 27570 Bremerhaven, Germany

15 <sup>5</sup>Institute of Applied Geosciences, National Taiwan Ocean University, Keelung 20224,  
16 Taiwan

17  
18 Corresponding authors:

19 Jianjun Zou ([zoujianjun@fio.org.cn](mailto:zoujianjun@fio.org.cn)), Xuefa Shi ([xfshi@fio.org.cn](mailto:xfshi@fio.org.cn))

20  
21 **Key Points**

22 1. This study reconstructs the History-history of sedimentary oxygenation processes at  
23 mid-depths in the western subtropical North Pacific since the Last-last gGlacial period  
24 is reconstructed using sediment bound geochemical proxies.

25 2. Sediment-bound rRedox-sensitive proxies reveal millennial-scale variations in  
26 sedimentary oxygenation that correlated closely to changes in the North Pacific  
27 Intermediate Water.

28 3. A millennial-scale out-of-phase relationship between deglacial ventilation in the  
29 western subtropical North Pacific and the formation of North Atlantic Deep Water is  
30 suggested.

带格式的: 无下划线, 字体颜色: 自动设置

31 | 4. A larger CO<sub>2</sub> storage at mid-depths of the North Pacific corresponds to the  
32 | termination of atmospheric CO<sub>2</sub> rise during the Bölling-Alleröd interval.

33

带格式的: 无下划线, 字体颜色: 自动设置

## Abstract

Deep ocean carbon cycle, especially carbon sequestration and outgassing, is one of the competitive mechanisms to explain variations in Lower glacial atmospheric CO<sub>2</sub> concentrations on orbital and millennial timescales have been attributed to carbon sequestration in deep oceans. However, the potential roles of voluminous subtropical North Pacific subsurface waters in modulating atmospheric CO<sub>2</sub> levels on millennial timescales are is poorly constrained. Further, an increase in respired CO<sub>2</sub> concentration in the glacial deep ocean due to biological pump generally is coeval with corresponds to less deoxygenation in the subsurface layer. This link thus offers a chance to visit oceanic ventilation and the coeval export productivity based on redox-controlled sedimentary geochemical parameters. Here we investigate a suite of sediment geochemical proxies in a sediment core CSH1 to understand the sedimentary oxygenation variations in the subtropical North Pacific (core CSH1) over the last 50 thousand years (ka). Our results suggest that enhanced sedimentary oxygenation at mid-depths of the subtropical North Pacific intensifies occurred during the cold interval episodes of late glacial (50–25 ka), Last Glacial Maximum (LGM) and also the interval after 8.5 ka, while decreased oxygenation during the Bölling-Alleröd (B/A) and Preboreal. The especially pronounced for the North Atlantic millennial scale abrupt cold events of the Younger Dryas, Heinrich Stadial (HS) 1 and 2. On the other hand, oxygen-depleted seawater is found during the Bölling–Alleröd (B/A) and Preboreal. Our findings of enhanced sedimentary oxygenation in the subtropical North Pacific is aligned with intensified formation of North Pacific Intermediate Water (NPIW) during cold spells, while the ameliorated sedimentary oxygenation seems to be linked with to the intensified Kuroshio Current since 8.5 ka. The enhanced formation of NPIW during HS1 can be driven by the perturbation of sea ice formation and sea surface salinity oscillation in high-latitude North Pacific. The In our results, diminished sedimentary oxygenation during the B/A due to upwelling of aged, nutrient-rich deep water and enhanced export production, indicates an enhanced CO<sub>2</sub> sequestration at mid-depth waters, along with a slight increase in atmospheric CO<sub>2</sub> concentration. Mechanistically, we We speculate that attribute these millennial-scale

带格式的：无下划线，字体颜色：自动设置

带格式的：无下划线，字体颜色：自动设置

带格式的：无下划线，字体颜色：自动设置

带格式的：无下划线，字体颜色：自动设置

带格式的：无下划线，字体颜色：自动设置

带格式的：无下划线，字体颜色：自动设置

带格式的：无下划线，字体颜色：自动设置

带格式的：无下划线，字体颜色：自动设置

changes ~~were linked to the intensified NPIW and enhanced abyss flushing during deglacial cold and warm intervals, respectively, on the basis of background climate change due to shift in strength of North Atlantic Deep Water formation, leading to intensification of NPIW formation and enhanced abyss flushing during deglacial cold and warm intervals, respectively. Enhanced formation of NPIW seem to be driven by the perturbation of sea ice formation and sea surface salinity oscillation in high latitude North Pacific through atmospheric and oceanic teleconnection. During the B/A, decreased sedimentary oxygenation likely resulted from an upward penetration of aged deep water into the intermediate depth in the North Pacific, corresponding to a resumption of Atlantic Meridional Overturning Circulation.~~

**Keywords:** sedimentary oxygenation; millennial timescale; North Pacific Intermediate Water; North Atlantic Deep Water~~Atlantic Meridional Overturning Circulation~~; subtropical North Pacific

带格式的: 无下划线, 字体颜色: 自动设置

带格式的: 无下划线, 字体颜色: 自动设置

带格式的: 无下划线, 字体颜色: 自动设置

带格式的: 首行缩进: 0 字符, 行距: 1.5 倍行距

带格式的: 缩进: 首行缩进: 0 字符, 行距: 1.5 倍行距

## 1. Introduction

The sluggish ocean ventilation and efficient biological pump in the ocean ~~depletes dissolved oxygen in the sediment water interface and~~ facilitates the carbon storage-sequestration of respired in the ocean interior-carbon, linking to atmospheric CO<sub>2</sub> drawdown, which in turn plays a crucial role in regulating sedimentary oxygen; ~~potentially linking to atmospheric CO<sub>2</sub> changes~~ on millennial and orbital ~~and millennial~~ timescales (Hoogakker et al., 2015; Jaccard and Galbraith, 2012; Sigman and Boyle, 2000). ~~The r~~Reconstruction of past sedimentary oxygenation is therefore crucial for understanding changes in export productivity and the renewal rate of deep ocean circulation (Nameroff et al., 2004). Previous studies from high-latitude eastern and western North Pacific margins~~s~~ and subarctic Pacific have identified drastic variations in export productivity and ~~marine-ocean~~ oxygen levels at glacial-interglacial timescales using diverse proxies such as trace elements (Cartapanis et al., 2011; Chang et al., 2014; Jaccard et al., 2009; Zou et al., 2012), benthic foraminiferal assemblages (Ohkushi et al., 2016; Ohkushi et al., 2013; Shibahara et al., 2007) and nitrogen isotopic composition ( $\delta^{15}\text{N}$ ) of organic matter (Addison et al., 2012; Chang et al., 2014; Galbraith et al., 2004; Riethdorf et al., 2016) in marine sediment ~~cored sediments~~. These studies further suggested that both North Pacific Intermediate Water (NPIW) and export of organic ~~carbon-matter~~ regulate the sedimentary oxygenation variation during the last glaciation and Holocene in the ~~northeast-subarctic~~ North Pacific. By contrast, little information exists on millennial-scale oxygenation changes to date in the western subtropical North Pacific.

The modern NPIW is mainly sourced from the NW Pacific marginal seas (Shcherbina et al., 2003; Talley, 1993; You et al., 2000), and then it spreads into subtropical North Pacific at intermediate depths of 300 to 800 m (Talley, 1993). The pathway and circulation of NPIW have been identified by You (2003), who suggested that cabbeling, a mixing process to form a new water mass with increased density than that of parent water masses, is the principle mechanism responsible for transforming subpolar source waters into subtropical NPIW along the subarctic-tropical frontal zone. More specifically, You et al. (2003) argued that a

带格式的: 无下划线, 字体颜色: 自动设置

lower subpolar input of about 2 Sv ( $1 \text{ Sv} = 10^6 \text{ m}^3/\text{s}$ ) is sufficient for subtropical ventilation. Benthic foraminiferal  $\delta^{13}\text{C}$  ~~data, a quasi-conservative tracer for water mass,~~ from the North Pacific suggested ~~an~~ enhanced ventilation (~~enriched  $\delta^{13}\text{C}$~~ ) at water depths of < 2000 m during the last glacial period (Keigwin, 1998; Matsumoto et al., 2002). Furthermore, on the basis of both radiocarbon data and modeling results, Okazaki et al. (2010) provided further insight into the formation of deep water in the North Pacific during early deglaciation. Enhanced NPIW penetration is further explored using numerical model simulations (Chikamoto et al., 2012; Gong et al., 2019; Okazaki et al., 2010). ~~The downstream effects of intensified GNPIW can be seen in the record of  $\delta^{13}\text{C}$  of *Cibicides wuellerstorfi* in core PN-3 from the middle Okinawa Trough (OT), whereas lower deglacial  $\delta^{13}\text{C}$  values were attributed to enhanced OC accumulation rates due to higher surface productivity by Wahyudi and Minagawa (1997). More recently, Max et al (2017) identified the substantial effects of intensified NPIW on  $\delta^{13}\text{C}$  of deep-dwelling planktic foraminifera *Globorotaloides hexagonus* in the Eastern Equatorial Pacific during Marine Isotope Stage (MIS) 2. Subsequently, Rippert et al. (2017) confirmed that such enhanced effect of NPIW also occurred during MIS 6. The downstream effects of intensified NPIW also can be seen in the record of  $\delta^{13}\text{C}$  of *Cibicides wuellerstorfi* in core PN-3 from the middle Okinawa Trough (OT), whereas lower deglacial  $\delta^{13}\text{C}$  values were attributed to enhanced OC accumulation rates due to higher surface productivity by Wahyudi and Minagawa (1997).~~

The Okinawa Trough is separated from the Philippine Sea by the Ryukyu Islands and is an important channel of the northern extension of the Kuroshio in the western subtropical North Pacific (Figure 1). ~~Initially the OT opened at the middle Miocene (Sibuet et al., 1987) and since then, it has been a depositional center in the East China Sea (ECS), receiving large sediment supplies from nearby rivers (Chang et al., 2009).~~ Surface hydrographic characteristics of the OT over glacial-interglacial cycles are largely influenced by the Kuroshio and ~~East China Sea~~ECS Coastal Water (Shi et al., 2014); the latter is related to the strength of summer East Asian monsoon (EAM) sourced from the western tropical Pacific. Modern physical oceanographic

带格式的: 无下划线, 字体颜色: 自动设置

investigations showed that intermediate waters in the OT are mainly derived from horizontal advection and mixture of NPIW and South China Sea Intermediate Water (Nakamura et al., 2013). These waters intrude into the OT through two ways (Nakamura et al., 2013): (i) deeper part of the Kuroshio enters the OT through the channel east of Taiwan (sill depth 775 m) and (ii) through the Kerama Gap (sill depth 1100 m). In the northern OT, the occupied subsurface water mainly flows through the Kerama Gap through horizontal advection from the Philippine Sea (Nakamura et al., 2013). Recently, Nishina et al. (2016) found that an overflow through the Kerama Gap controls the modern deep-water ventilation in the southern OT.

Both surface hydrography and deep ventilation in the OT varied greatly since the last glaciation. During the last glacial periods, the mainstream of the Kuroshio likely migrated to the east of the Ryukyu Islands or and also became weaker due to lower sea levels (Shi et al., 2014; Ujiie and Ujiie, 1999; Ujiie et al., 2003) and the hypothetical emergence of a Ryukyu-Taiwan land bridge (Ujiie and Ujiie, 1999). In a recent study, based on the Mg/Ca-derived temperatures in surface and thermocline waters and planktic foraminiferal indicators of water masses from two sediment cores located in the northern and southern OT, Ujiie et al. (2016) ~~further~~ argued that the hydrological conditions of North Pacific Subtropical Gyre since MIS 7 is modulated by the interaction between the Kuroshio and the NPIW. Besides the Kuroshio, the flux of East Asian rivers to the ~~East China Sea (ECS)~~, which is related to the summer EAM and the sea level oscillations coupled with topography ~~are also have also been~~ regulating the surface hydrography in the ~~Okinawa Trough~~ OT (Chang et al., 2009; Kubota et al., 2010; Sun et al., 2005; Yu et al., 2009).

Based on benthic foraminiferal assemblages, previous studies have implied a reduced oxygenation in deep waters of the middle and southern OT during the last deglacial period (Jian et al., 1996; Li et al., 2005), but a strong ventilation during the Last Glacial Maximum (LGM) and the Holocene (Jian et al., 1996; Kao et al., 2005). High sedimentary  $\delta^{15}\text{N}$  values, an indicator of increased denitrification in the subsurface water column, also occurred during the late deglaciation in the middle OT (Kao et al., 2008). Inconsistent with these results, Dou et al. (2015) suggested an oxic

带格式的: 无下划线, 字体颜色: 自动设置

depositional environment during the last deglaciation in the southern OT based on weak positive cerium anomalies. Furthermore, Kao et al. (2006) concluded a reduced ventilation of deepwater in the OT during the LGM due to the reduction of KC inflow using a 3-D ocean model. Yet, the patterns and reasons that caused sedimentary oxygenation in the OT thus remain unclear.

## 2. Paleo-redox proxies

Sedimentary redox condition is ~~the balance between~~ governed by the rate of oxygen supply from the overlying bottom water and the rate of oxygen removal from pore water (Jaccard et al., 2016), processes that are ~~closely~~ related to the supply of oxygen by ocean circulation ~~advection of submarine ocean circulation~~ and organic matter respiration, respectively. Contrasting geochemical behaviors of redox-sensitive trace metals (Mn, Mo, U, etc.) have been ~~extensively~~ used to reconstruct bottom water and sedimentary oxygen changes (Algeo, 2004; Algeo and Lyons, 2006; Crusius et al., 1996; Dean et al., 1997; Tribovillard et al., 2006; Zou et al., 2012), as their concentrations readily respond to redox condition of the depositional environment (Morford and Emerson, 1999).

In general, enrichment of Mn with higher speciation states (Mn (III) and Mn (IV)) in the form of Mn-oxide coatings is observed in marine sediments, when oxic condition prevails into greater sediment depths as a result of low organic matter degradation rates and well-ventilated bottom water (Burdige, 1993). ~~In-Under~~ reducing conditions, the authigenic fraction of Mn (as opposed to its detrital background) is released as dissolved Mn (II) species into the pore water and thus its concentration is usually low in suboxic ( $O_2$  and  $HS^-$  absent) and anoxic ( $HS^-$  present) sediments. In addition, when Mn enrichment occurs in oxic sediments as solid phase Mn oxyhydroxides, it may lead to co-precipitation of other elements, such as Mo (Nameroff et al., 2002).

The elements Mo and U behave conservatively in oxygenated seawater, but are preferentially enriched in oxygen-depleted water (Morford and Emerson, 1999).

However, these two trace metals behave differently in several ways. Molybdenum can be enriched in both oxic sediments, such as the near surface manganese-rich horizons

带格式的: 无下划线, 字体颜色: 自动设置

域代码已更改



199 in continental margin environments (Shimmield and Price, 1986) and in anoxic  
200 sediments (Nameroff et al., 2002). Under anoxic conditions, Mo can be reduced either  
201 from the +6 oxidation state to insoluble MoS<sub>2</sub>, though this process is known to occur  
202 only under extremely reducing conditions, such as hydrothermal and/or diagenesis  
203 (Dahl et al., 2010; Helz et al., 1996) or be converted to particle-reactive  
204 thiomolybdates (Vorlicek and Helz, 2002). Zheng et al. (2000) suggested two critical  
205 thresholds for Mo scavenging from seawater: 0.1  $\mu$ M hydrogen sulfide (H<sub>2</sub>S) for  
206 Fe-S-Mo co-precipitation and 100  $\mu$ M H<sub>2</sub>S for Mo scavenging as Mo-S or as  
207 particle-bound Mo without Fe. Although Crusius et al. (1996) noted insignificant  
208 enrichment of sedimentary Mo under suboxic conditions, Scott et al. (2008) argued  
209 that burial flux of Mo is not so low in suboxic environments. Excess concentration of  
210 Mo (Mo<sub>excess</sub>) in sediments thus suggests the accumulation of sediments either in  
211 anoxic (H<sub>2</sub>S occurrence) or well oxygenated conditions (if Mo<sub>excess</sub> is in association  
212 with Mn-oxides).

213 In general, U is enriched in anoxic sediments (>1  $\mu$ M H<sub>2</sub>S), but not in oxic  
214 sediments (>10  $\mu$ M O<sub>2</sub>) (Nameroff et al., 2002). Accumulation of U depends on the  
215 content of reactive organic matter (Sundby et al., 2004) and U precipitates as uraninite  
216 (UO<sub>2</sub>) during the conversion of Fe (III) to Fe (II) in suboxic conditions (Morford and  
217 Emerson, 1999; Zheng et al., 2002). One of the primary removal mechanisms for U  
218 from the ocean is via diffusion across the sediment-water interface of reducing  
219 sediments (Klinkhammer and Palmer, 1991). Under suboxic conditions, soluble U (VI)  
220 is reduced to insoluble U (IV), but free sulfide is not required for U precipitation  
221 (McManus et al., 2005). Jaccard et al. (2009) suggested that the presence of excess  
222 concentration of U (U<sub>excess</sub>) in the absence of Mo enrichment is indicative of a suboxic,  
223 but not sulfidic condition, within the diffusional range of the sediment-water interface.  
224 The felsic ~~volcanic~~ volcanism is also a primary source of uranium (Maithani and  
225 Srinivasan, 2011). Therefore, the potential input of uranium from active volcanic  
226 sources around the northwestern Pacific to the adjacent sediments should not be  
227 neglected.

228 In this study, we investigate a suite of redox-sensitive elements and the ratio of

域代码已更改

Mo/Mn along with productivity proxies from a sediment core retrieved from the northern OT to reconstruct the sedimentary oxygenation in the western subtropical North Pacific over the last 50ka. Based on that, we propose that multiple factors, such as NPIW ventilation, the strength of the Kuroshio Current and export productivity, control the bottom sedimentary oxygenation in the OT on millennial time-scales since the last glacial.

### 3. Oceanographic setting

~~The OT resulted from the collision of the Philippine and Eurasian plates and initially opened at the middle Miocene (Sibuet et al., 1987). Since that time, the OT has been a depositional center in the ECS and receives large sediment supplies from nearby rivers (Chang et al., 2009). At present, water depth in the axial part of the OT deepens from 500 m in the north to 2700 m in the south.~~

Surface hydrographic characteristics of the OT are mainly controlled by the warmer, more saline, oligotrophic Kuroshio water and cooler, less saline, nutrient-rich Changjiang Diluted Water, and the modern flow-path of the former is influenced by the bathymetry of the OT (Figure 1a). The Kuroshio Current originates from the North Equatorial Current and flows into the ECS from the Philippine Sea through the Suao-Yonaguni Depression. In the northern OT, Tsushima Warm Current (TWC), a branch of the Kuroshio, flows into the Japan Sea through the shallow Tsushima Strait. Volume transport of the Kuroshio varies seasonally due to the influence of the EAM with a maximum of 24 Sv (~~1 Sv = 10<sup>6</sup> m<sup>3</sup>/s~~) in summer and a minimum of 20 Sv in autumn across the east of Taiwan (Qu and Lukas, 2003).

Figure 2a ~~and 2b and b~~ show that the lower sea surface salinity (SSS) zone in summer ~~relative to the one in winter~~ in the ECS migrates toward the east of OT, indicating enhanced impact of the Changjiang discharge associated with summer EAM. ~~An estimated ~80% of The-the~~ mean annual discharge of ~~the~~ Changjiang ~~is 0.028 Sv and ~80% of its total discharge~~ is supplied to the ECS (Ichikawa and Beardsley, 2002). ~~In and in situ observational data of surface hydrography along the ship track from Taiwan Strait to Korea Strait and around the entrance of the Tsushima Strait in the northern part of the ECS show a lower SSS in summer and a pronounced~~

域代码已更改

域代码已更改

域代码已更改

域代码已更改

带格式的：字体：(中文)+中文正文，小四，非突出显示

带格式的：字体：小四，非突出显示

域代码已更改

域代码已更改

negative correlation between the Changjiang discharge and SSS in July (Delcroix and Murtugudde, 2002). ~~Lower SSS in summer than that in winter suggests stronger effects of summer EAM on surface hydrography over the Kuroshio Current (Sun et al., 2005).~~ Consistently, previous studies from the ~~Okinawa Trough~~OT reported such close relationship between summer EAM and SSS back to the late Pleistocene (Chang et al., 2009; Clemens et al., 2018; Kubota et al., 2010; Sun et al., 2005).

Despite the effects of EAM and the Kuroshio, evidence of geochemical tracers (temperature, salinity, oxygen, nutrients and radiocarbon- $\Delta^{14}\text{C}$ ) collected during the World Ocean Circulation Experiment (WOCE) Expeditions in the Pacific (transects P24 and P03) favors the presence of low saline, nutrient-enriched intermediate and deep waters (Talley, 2007). Dissolved oxygen content is  $<100 \mu\text{M}$ -mol/kg at water depths of below 600 m in the OT along WOCE transects PC03 and PC24 (Talley, 2007). Modern oceanographic observations at the Kerama Gap reveal that upwelling in the OT is associated with the inflow of NPIW and studies using box model predicted that overflow through the Kerama Gap is responsible for upwelling ( $3.8\text{--}7.6 \times 10^{-6} \text{ m s}^{-1}$ ) (Nakamura et al., 2013; Nishina et al., 2016).

#### 4. Materials and methods

##### 4.1. Chronostratigraphy of core CSH1

A 17.3 m long sediment core CSH1 ( $31^{\circ} 13.7' \text{ N}$ ,  $128^{\circ} 43.4' \text{ E}$ ; water depth: 703 m) was collected from the northern OT, close to the main stream of ~~Tsushima Warm Current (TWC)~~ (Figure 1b) and within the depth of NPIW (Figure 1c) using a piston corer during *Xiangyanghong09* Cruise in 1998. This location is thus enabling us to reconstruct millennial-scale changes in the properties of TWC and NPIW. The expedition was carried out by the First Institute of Oceanography, Ministry of Natural Resources of China. Core CSH1 mainly consists of clayey silt and silt with occurrence of plant debris at some depth intervals (Ge et al., 2007) (Figure 3a). In addition, three layers of volcanic ash were observed at depths of 74–106 cm, 782–794 cm, 1570–1602 cm and these three intervals can be correlated with well-known ash layers, Kikai-Akahoya (K-Ah; 7.3 ka), Aira-Tanzawa (AT; 29.24 ka) and Aso-4 (roughly around MIS 5a) (Machida, 1999), respectively. The core was split and

域代码已更改

域代码已更改

域代码已更改

域代码已更改

域代码已更改

域代码已更改

域代码已更改

域代码已更改

域代码已更改

289 sub-sampled at every 4 cm interval and then stored in China Ocean Sample  
290 Repository at 4 °C until analysis.

291 Previously, some paleoceanographic studies have been conducted and a set of  
292 data have been investigated for core CSH1, including the contents of planktic  
293 foraminifers as well as their carbon ( $\delta^{13}\text{C}$ ) and oxygen isotope ( $\delta^{18}\text{O}$ ) compositions  
294 (Shi et al., 2014), pollen (Chen et al., 2006), paleomagnetism (Ge et al., 2007) and  
295  $\text{CaCO}_3$  (Wu et al., 2004). An age model for this core has been constructed by using  
296 ten Accelerator Mass Spectrometry (AMS)  $^{14}\text{C}$  dates and six oxygen isotope ( $\delta^{18}\text{O}$ )  
297 age control points. The whole 17.3 m core contains *ca.* 88 ka-long record of  
298 continuous sedimentation (Shi et al., 2014).

299 It is noteworthy that previous age control points with constant radiocarbon  
300 reservoir throughout core CSH1 are used to reveal orbital-scale Kuroshio variations  
301 (Shi et al., 2014), but insufficient to investigate millennial-scale climatic events. On  
302 the basis of original age model, a higher abundance of *Neogloboquadrina*  
303 *pachyderma* (*dextral*) that occurred during warmer intervals, such as the B/A, has  
304 been challenging to explain reasonably. On the other hand, paired measurements of  
305  $^{14}\text{C}/^{12}\text{C}$  and  $^{230}\text{Th}$  ages from Hulu Cave stalagmites suggest magnetic field change has  
306 greatly contributed to high atmospheric  $^{14}\text{C}/^{12}\text{C}$  values at HS4 and the YD (Cheng et  
307 al., 2018). Thus a constant reservoir age assumed when calibrating foraminiferal  
308 radiocarbon dates using CALIB 6 software and the Marine\_13 calibration dataset  
309 (Reimer et al., 2013) for ~~Core-core~~ CSH1 may cause large chronological  
310 uncertainties.

311 Here, we therefore recalibrated the radiocarbon dates using CALIB 7.04 software  
312 with Marine 13 calibration dataset (Reimer et al., 2013). Moreover, on the basis of  
313 significant correlation between planktic foraminifera *species Globigerinoides ruber*  
314  $\delta^{18}\text{O}$  and Chinese stalagmite  $\delta^{18}\text{O}$  (Cheng et al., 2016), a proxy of summer EAM  
315 related to SSS of the ECS, we re-established the age model for core CSH1 (Figures  
316 3b-d). Overall, the new chronological framework is similar to the one previously  
317 reported by Shi et al. (2014), but with more dates. In order to compare with published  
318 results associated with ventilation changes in the North Pacific, here we mainly report

域代码已更改

the history of sedimentary oxygenation in the northern OT since the last glacial period. Linear sedimentation rate varied between  $\sim 10$  and ~~60–40~~ cm/ka with higher sedimentation rate (around 30–40 cm/ka) between  $\sim 24$  ka and 32.5 ka. The age control points were shown in Table 2.–

#### 4.2. Chemical analyses

Sediment subsamples for geochemical analyses were freeze-dried and ground to a fine powder with an agate mortar and pestle. Based on the age model, 85 subsamples from core CSH1 with time resolution of about ~~200–600~~ years (every 4 cm interval) were selected for detailed geochemical analyses of major and minor elements and total contents of carbon (TC), organic carbon (TOC) and nitrogen (TN). The pretreatment of sediment and other analytical methods have been reported elsewhere (Zou et al., 2012).

TC and TN were determined with an elemental analyzer (EA; Vario EL III, Elementar Analysen systeme GmbH) in the Key Laboratory of Marine Sediment and Environment Geology, First Institute of Oceanography, Ministry of Natural Resources of China, Qingdao. Carbonate was removed from sediments by adding 1M HCl to the homogenized sediments for total organic carbon (TOC) analysis using the same equipment. The content of calcium carbonate ( $\text{CaCO}_3$ ) was calculated using the equation:

$$\text{CaCO}_3 = (\text{TC} - \text{TOC}) \times 8.33$$

where 8.33 is the ratio between the molecular weight of carbonate and the atomic weight of carbon. National reference material (GSD-9), blank sample and replicated samples were used to control the analytical process. The relative standard deviation of the GSD-9 for TC, TN and TOC is  $\leq 3.4\%$ .

About 0.5 g of sediment powder was digested in double distilled  $\text{HF}:\text{HNO}_3$  (3:1), followed by concentrated  $\text{HClO}_4$ , and then re-dissolved in 5%  $\text{HNO}_3$ . Selected major and minor elements such as aluminum (Al) and manganese (Mn) were determined by inductively coupled plasma optical emission spectroscopy (ICP-OES; Thermo Scientific iCAP 6000, Thermo Fisher Scientific), as detailed elsewhere (Zou et al., 2012). In addition, Mo and U were analyzed with inductively coupled plasma mass

域代码已更改

域代码已更改

spectrometry (ICP-MS; Thermo Scientific XSERIES 2, Thermo Fisher Scientific), as described in Zou et al. (2012). Precision for most elements in the reference material GSD-9 is  $\leq 5\%$  relative standard deviation. The excess fractions of U and Mo were estimated by normalization to Al:

$$\text{Excess fraction} = \frac{\text{total}_{\text{element}} - (\text{element}/\text{Al}_{\text{average shale}} \times \text{Al})}{\text{Al}_{\text{average shale}}}, \text{ with } \text{U}/\text{Al}_{\text{average shale}} = 0.307 \times 10^{-6} \text{ and } \text{Mo}/\text{Al}_{\text{average shale}} = 0.295 \times 10^{-6} \text{ (Li and Schoonmaker, 2014).}$$

In addition, given the different geochemical behaviors of Mn and Mo and co-precipitation and adsorption processes associated with the redox cycling of Mn, we calculated the ratio of Mo to Mn, given assuming that higher Mo/Mn ratio indicates lower oxygen content in the depositional environment and vice versa. In combination with the concentration of excess uranium, we infer the history of sedimentary oxygenation in the subtropical North Pacific since the last glaciation.

## 5. Results

### 5.1. TOC, TN, and CaCO<sub>3</sub>

The content of CaCO<sub>3</sub> varies from 8.8 to 35% (Figure 4a) and it mostly shows higher values with increasing trends during the last deglaciation. In contrast, the content of CaCO<sub>3</sub> is low and exhibits decreasing trends during the late MIS 3 and the LGM (Figure 4a). TN content shows a larger variation compared to TOC (Figure 4b), but it still strongly correlates with TOC ( $r = 0.74$ ,  $p < 0.01$ ) throughout the entire core. Concentration of TOC ranges from 0.5 to 2.1% and it shows higher values with stable trends during the last glacial phase (MIS 3) (Figure 4c). Molar ratios of TOC/TN vary around 10, with higher ratios at the transition into the LGM (Figure 4d), corresponding to higher linear sedimentation rate (Figure 4a4e). ~~The content of CaCO<sub>3</sub> varies from 8.8 to 35% (Figure 4e) and it mostly shows higher values with increasing trends during the last deglaciation. Conversely, the content of CaCO<sub>3</sub> is low and exhibits decreasing trends during late MIS 3 and the LGM (Figure 4e).~~

Both TOC and CaCO<sub>3</sub> have been ~~are widely~~ used as proxies for the reconstruction of past export productivity (Cartapanis et al., 2011; Lembke-Jene et al., 2017; Rühlemann et al., 1999). Molar C/N ratios of  $>10$  (Figure 4c) suggest that terrigenous organic sources significantly contribute to the TOC concentration in core

CSH1. The TOC content therefore may be not a reliable proxy for the reconstruction of surface water export productivity during times of the LGM and late deglaciation, when maxima in C/N ratios co-occur with decoupled trends between  $\text{CaCO}_3$  and TOC concentrations.

Several lines of evidence support  $\text{CaCO}_3$  as a reliable productivity proxy, particularly during the last deglaciation. (Shi et al., 2014) In addition, the strong negative correlation coefficient ( $r = -0.85$ ,  $p < 0.01$ ) between Al and  $\text{CaCO}_3$  in sediments throughout core CSH1 confirms the biogenic origin of  $\text{CaCO}_3$  against terrigenous Al (Figure 4f). Generally, terrigenous dilution decreases the concentrations of  $\text{CaCO}_3$ . Inconsistent relationship between percentage  $\text{CaCO}_3$  and sedimentation rate indicates a minor effect of dilution on  $\text{CaCO}_3$ . Furthermore, the increasing trend in  $\text{CaCO}_3$  associated with high sedimentation rate during the last deglacial interval indicates a substantial increase in export productivity (Figures 4a and 4d). The high coherence between percentage  $\text{CaCO}_3$  and alkenone-derived sea surface water (SST) (Shi et al., 2014) indicates a direct control on  $\text{CaCO}_3$  by SST. Moreover, a detailed comparison between  $\text{CaCO}_3$  concentrations and the previously published foraminiferal fragmentation ratio (Wu et al., 2004) clearly shows, apart from a small portion within the LGM, no clear co-variation between them. This/These evidence suggests that  $\text{CaCO}_3$  changes are primarily driven primarily by variations in carbonate primary production, and not overprinted by secondary processes, such as carbonate dissolution through changes in the lysocline depth and dilution by terrigenous material through changes in the lysocline depth. Likewise, similar deglacial trend in  $\text{CaCO}_3$  is also observed in core MD01-2404 (Chang et al., 2009), indicating a ubiquitous, not local picture in the OT. On the other hand, terrigenous dilution generally decreases the content of  $\text{CaCO}_3$ . All these lines of evidence thus support  $\text{CaCO}_3$  of core CSH1 as a reliable productivity proxy to a first order approximation. The increasing trend of  $\text{CaCO}_3$  associated with high sedimentation rate (Figures 4a, e) indicates a substantial increase in export productivity during the last deglacial interval. Thus, we can confidently use  $\text{CaCO}_3$  content as productivity proxy to a first order approximation.

域代码已更改

域代码已更改

带格式的：下标

带格式的：下标

域代码已更改

域代码已更改

域代码已更改

## 5.2. Redox-sensitive Elements

Figure 4 shows time series of selected redox-sensitive elements (RSEs) and proxies derived from them. Mn shows higher concentrations during the LGM and HS1 (16 ka–22.5 ka) and middle-late Holocene, but lower concentrations during the last deglacial and Preboreal periods (15.8 ka–9.5 ka) (Figure 4g). Generally, concentrations of excess Mo and excess U (Figures 4j and 4l) show coherent patterns with those of Mo and U (Figures 4i and 4k), but both are out-of-phase with Mn over the last glacial period (Figure 4h). It should be noted that pronounced variations in U concentration since 8.5 ka is related to the occurrence of discrete volcanic materials.

A significant positive Eu anomaly (Zhu et al., 2015) together with more radiogenic Nd values (unpublished data) from the same core confirms the occurrence of discrete volcanic materials and its dilution effects on terrigenous components since 7 ka. Occurrence of discrete volcanic material is likely related to intensified Kuroshio Current during the mid-late Holocene, as supported by higher hydrothermal Hg concentrations in sediments from the middle OT (Lim et al., 2017).

A negative correlation between Mn and Mo<sub>excess</sub> during the last glaciation and the Holocene, and the strong positive correlation between them during the LGM and HS1 (Figures 5a and 5b) further corroborate the complicated geochemical behaviors of Mn and Mo. A strong positive correlation between Mo<sub>excess</sub> and Mn (Figure 5b) seems to may be attributed to co-precipitation of Mo by Mn-oxyhydroxide under oxygenated conditions. Here, we use Mo/Mn ratio, instead of excess Mo concentration to reconstruct variations in sedimentary redox state conditions in the study area. Overall, the Mo/Mn ratio shows similar downcore pattern to that of Mo<sub>excess</sub> with higher values ratios during the last deglaciation, but lower values-ratios during the LGM and HS1. A strong correlation ( $r = 0.69$ ) between Mo/Mn ratio and excess U concentration (excluding the data of Holocene, due to contamination of volcanic material, Figure 5c) further corroborates the integrity of Mo/Mn as an indicator of sedimentary oxygenation changes.

Rapidly decreasing Mo/Mn ratio indicates an oxygenated sedimentary environment since ~8 ka (Figure 4h). Both higher Mo/Mn ratios and excess U

域代码已更改

域代码已更改

域代码已更改

域代码已更改



concentration, together with lower Mn concentrations suggest an oxygen-deficient deoxygenated sedimentary-depositional condition environment during the late deglacial period (15.8 ka–9.5 ka), whereas lower values-ratios during the LGM, HS1 and HS2 indicate relatively better oxygenated sedimentary condition. A decreasing trend in Mo/Mn ratio and excess U concentration from 50 ka to 25 ka also suggest higher sedimentary oxygen levels.

## 6. Discussion

### 6.1. Constraining paleoredox conditions in the Okinawa Trough

In general, three different terms, hypoxia, suboxia and anoxia, are widely used to describe the degree of oxygen depletion in the marine environment (Hofmann et al., 2011). Here, we adopt the definition of oxygen thresholds by Bianchi et al. (2012), for oxic ( $>120 \mu\text{mol/kg O}_2$ ), hypoxic ( $<60\text{--}120 \mu\text{mol/kg O}_2$ ) and suboxic ( $<2\text{--}10 \mu\text{mol/kg O}_2$ ) conditions, whereas anoxia is the absence of measurable oxygen. Generally, redox states in waters can be classified as oxic ( $>89 \mu\text{mol/L O}_2$ ), suboxic ( $\sim 8.9\text{--}89 \mu\text{mol/L O}_2$ ), anoxic-nonsulfidic ( $<89 \mu\text{mol/L O}_2$ ,  $0 \mu\text{mol/L H}_2\text{S}$ ), and anoxic-sulfidic or euxinic ( $0 \text{ ml O}_2/\text{L}$ ,  $>0 \mu\text{mol/L H}_2\text{S}$ ) (Savirna and Bottjer, 1991).

Proxies associated with RSEs, such as sedimentary Mo concentration (Lyons et al., 2009; Scott et al., 2008) have been used to constrain the degree of oxygenation in seawater. Algeo and Tribouillard (2009) proposed that open-ocean systems with suboxic waters tend to yield  $U_{\text{excess}}$  enrichment relative to  $Mo_{\text{excess}}$  and to result resulting in sediment  $(Mo/U)_{\text{excess}}$  ratio less than that of seawater (7.5–7.9). Under increasingly reducing and occasionally sulfidic conditions, the accumulation of  $Mo_{\text{excess}}$  increase relative to that of  $U_{\text{excess}}$  leading the  $(Mo/U)_{\text{excess}}$  ratio either is equal to or exceeds with that of seawater. Furthermore, Scott and Lyons (2012) suggested a non-euxinic condition with the presence of sulfide in pore waters, when Mo concentrations range from  $> 2 \text{ ppm}\mu\text{g/g}$ , the crustal average to  $< 25 \text{ ppm}\mu\text{g/g}$ , a threshold concentration for euxinic condition. Given that the northern Okinawa Trough OT is located in the open oceanic settings weakly restricted basin settings, we use these two above mentioned proxies to evaluate the degree of oxygenation in

带格式的：字体：(中文) 宋体

带格式的：字体：(中文) 宋体

带格式的：字体：(中文) 宋体

带格式的：字体：(中文) 宋体，下标

带格式的：字体：(中文) 宋体

带格式的：字体：(中文) 宋体，下标

带格式的：字体：(中文) 宋体

带格式的：字体：(中文) 宋体，下标

带格式的：字体：(中文) 宋体

带格式的：字体：(中文) 宋体

带格式的：字体：(中文) 宋体

带格式的：字体：(中文) 宋体

带格式的：字体：(中文) 宋体

带格式的：字体：(中文) 宋体

域代码已更改

域代码已更改

域代码已更改

带格式的：字体：小四

带格式的：字体：小四

sediments.

Both bulk Mo concentration (1.2-9.5 ~~ppm~~ $\mu\text{g/g}$ ) and excess (Mo/U) ratio (0.2-5.7) in core CSH1 suggest that oxygen-depleted conditions may have prevailed in the deep water of the northern OT over the last 50 ka (Figure 4m). However, increased excess Mo concentration with enhanced Mo/U ratio during the last termination (18-9 ka) indicate a stronger reducing condition compared to the Holocene and the last glacial period, though Mo concentration is less than 25 ~~ppm~~ $\mu\text{g/g}$ , a threshold for euxinic deposition proposed by Scott and Lyons (2012).

The relative abundance of benthic foraminiferal species that thrive in different oxygen concentrations also have been widely used to reconstruct the variations in bottom water ventilation, such as enhanced abundance of *Bulimina aculeata*, *Uvigerina peregrina* and *Chilostomella oolina* found under oxygen-depleted conditions in the central and southern OT during the last deglaciation (18 ka -9.2 ka) (Jian et al., 1996; Li et al., 2005). An oxygenated bottom water condition is also indicated by abundant benthic foraminifera species *Cibicides hyalina* and *Globocassidulina subglobosa* after 9.2 ka (Jian et al., 1996; Li et al., 2005) in cores E017 (1826 m water depth), 255 (1575 m water depth) and high benthic  $\delta^{13}\text{C}$  values (Wahyudi and Minagawa, 1997) in cores E017 (water depth 1826 m), 225 (water depth 1575 m) in core and PN-3 (water depth 1058 m water depth) from the middle and southern OT (Figures 1 and 3) during the postglacial period. The inferred ventilation pattern poorly-ventilated deep water in the middle and southern OT inferred from by benthic foraminiferal assemblages during the last deglaciation is coeval consistent with the one inferred from RSEs in the northern OT study referring to our RSEs (Figure 4). A clear linkage thus can be established between deep-water ventilation and sedimentary oxygenation in the OT. Although we did not carry out benthic foraminiferal species analyses for our core CSH1, it is reasonable to infer based on RSEs that the deepwater in the northern OT was also in a prominent oxygen-poor condition during the late deglacial interval. A clear link thus can be built between the ventilation of deep water and the sedimentary oxygenation in the OT. In brief Overall, a combination of our proxy records of RSEs in core CSH1 with other

域代码已更改

带格式的：字体：非倾斜

域代码已更改

带格式的：字体：非倾斜

域代码已更改

域代码已更改

records shows oxygen-rich conditions during the last glaciation and middle and late Holocene (since 8.5 ka) intervals, but oxygen-poor conditions during the ~~late-last deglaciation deglacial period~~.

## 6.2. Causes for sedimentary oxygenation variations

As discussed above, the pattern of RSEs in core CSH1 suggests that drastic changes in sedimentary oxygenation occurred on orbital and millennial timescales over the last glaciation in the ~~Okinawa Trough~~OT. In general, four factors can regulate the redox condition in the deep water column: (i) O<sub>2</sub> solubility, (ii) export productivity and subsequent degradation of organic matter, (iii) vertical mixing, and (iv) lateral ~~provision supply~~ of oxygen through intermediate and deeper water masses (Ivanochko and Pedersen, 2004; Jaccard and Galbraith, 2012). ~~These processes have been invoked in previous studies to explain the deglacial Pacific-wide variations in oxygenation by either one or a combination of these factors~~ (Galbraith and Jaccard, 2015; Moffitt et al., 2015; Praetorius et al., 2015). ~~In the OT, the oxygen deficiency during the late deglacial period can be caused either by one and/or a combination of more than one of these factors. Our data also suggest drastic variations in sedimentary oxygenation over the last 50 ka. However, In order to uncover the mechanisms responsible for sedimentary oxygenation variations in the basin-wide OT in the basin-wide OT and its connection with ventilation of the open North Pacific remain unclear. In order to place our core results in a wider regional context, here, we~~ compare our proxy records of sedimentary oxygenation (U<sub>excess</sub> concentration and Mo/Mn ratio) and export productivity (CaCO<sub>3</sub>) (Figures 6a, b, c) with ~~abundance of Pulleniatina obliquiloculata (an indicator of Kuroshio strength) and sea surface temperature (Shi et al., 2014), bulk sedimentary nitrogen isotope (an indicator of denitrification) (Kao et al., 2008), benthic foraminifera δ<sup>13</sup>C (a proxy for water mass) in cores PN-3 and PC23A (Rella et al., 2012; Wahyudi and Minagawa, 1997), a proxy for water mass, in core PC23A (Rella et al., 2012), abundance of benthic foraminifera (an indicator of hypoxia) in core E017 (Li et al., 2005) and ODP167 site 1017 (Cannariato and Kennett, 1999) the NE Pacific, an indicator of anoxic condition~~

带格式的: 字体: (中文) 宋体

域代码已更改

带格式的: 字体: (中文) 宋体

带格式的: 字体: 小四

带格式的: 字体: (中文) 宋体

带格式的: 字体: (中文) 宋体

带格式的: 字体: (中文) 宋体

域代码已更改

域代码已更改

带格式的: 字体: (中文) 宋体

域代码已更改

带格式的: 字体: (中文) 宋体

带格式的: 字体: (中文) 宋体

带格式的: 字体: (中文) 宋体, 字体颜色: 自动设置

带格式的: 字体: (中文) 宋体

域代码已更改

带格式的: 字体: (中文) 宋体

(Cannariato and Kennett, 1999), abundance of *Pulleniatina obliquiloculata*, an indicator of the Kuroshio strength (Shi et al., 2014) (Figures 6d-k).

### 6.2.1. Effects of regional ocean temperature on deglacial deoxygenation

Warming ocean temperatures lead to lower oxygen solubility. In the geological past, solubility effects connected to temperature changes of the water column thought to enhance or even trigger hypoxia (Praetorius et al., 2015). For instance, Shi et al. (2014) reported an increase in SST of around 4°C (~21°C to ~24.6°C) during the last deglaciation in core CSH1 (Figure 6d). Based on thermal solubility effects, a hypothetical warming of 1°C at our site would reduce oxygen concentrations by about 8–3.5 μmol/kg at water temperatures around 22°C (Brewer and Peltzer, 2016) (Benson and Krause, 1984), which therefore a ~4°C warming at core CSH1 (Shi et al., 2014) could drive a conservative estimate of a drop of <15 μmol/kg drastic in drop of oxygen concentration by assuming no large salinity changes <30 μM in subsurface water of the OT. Therefore, we assume that the late deglacial hypoxia in the OT underwent a similar increase in ocean temperatures. However, given the semi-quantitative nature of our data about oxygenation changes, which seemingly exceed an amplitude of >30–15 μmol/kgM, we suggest that other factors, in particular processes like e.g. local changes in export productivity, regional influences such as vertical mixing due to changes of the Kuroshio Current, as well as and far-field effects all may have played some decisive roles in shaping the oxygenation history of the OT.

### 6.2.2. Links between deglacial primary productivity and sedimentary deoxygenation

Previous studies have suggested the occurrence of high primary productivity in the entire OT during the last deglacial period (Chang et al., 2009; Jian et al., 1996; Kao et al., 2008; Li et al., 2017; Shao et al., 2016; Wahyudi and Minagawa, 1997). Such an increase in export production was due to favorable conditions for bloom development, which were likely induced by warm temperatures and maxima in nutrient availability, the latter being mainly sourced from increased discharge of the Changjiang River, erosion of material from the ongoing flooding of the shallow continental shelf in the ECS, and upwelling of Kuroshio Intermediate Water (Chang

带格式的: 字体: (中文) 宋体

带格式的: 字体: (中文) 宋体

域代码已更改

域代码已更改

域代码已更改

域代码已更改

域代码已更改

域代码已更改

域代码已更改

域代码已更改

et al., 2009; Li et al., 2017; Shao et al., 2016; Wahyudi and Minagawa, 1997). On the basis of sedimentary reactive phosphorus concentration, Li et al. (2017) concluded that export productivity increased during warm episodes but decreased during cold spells on millennial timescales over the last 91 ka in the OT. Gradually increasing concentrations of CaCO<sub>3</sub> in core CSH1 during the deglaciation (Figure 6a) and little changes in foraminiferal fragmentation ratios (Wu et al., 2004), are indicative of high export productivity in the northern OT. Accordingly, our data indicate that an increase in export productivity during the last deglaciation, which was previously ~~reported evidenced by concentrations of reactive phosphorus~~ (Li et al., 2017) and CaCO<sub>3</sub> (Chang et al., 2009) ~~from the middle-and southern OT during the last deglaciation~~, and thus was a pervasive, synchronous phenomenon of entire study region at the outermost extension of the ECS.

~~As a consequence, high export productivity lowers oxygen concentrations in deeper waters, due to subsurface consumption of oxygen by remineralization of organic matter.~~ Similar events of high export productivity have been ~~extensively~~ reported in the entire North Pacific due to increased nutrient supply, high SST, reduced sea ice cover, etc. (Crusius et al., 2004; Dean et al., 1997; Galbraith et al., 2007; Jaccard and Galbraith, 2012; Kohfeld and Chase, 2011). In most of these cases, ~~the increased~~ ds in productivity were thought to be likely also responsible for oxygen depletion in mid-depth waters, due to exceptionally high oxygen consumption. However, the productivity changes during the deglacial interval, very specifically CaCO<sub>3</sub>, are not fully consistent with the trends of excess U and Mo/Mn ratio (Figures 46b and 6c). The sedimentary oxygenation thus cannot be determined by export productivity alone.

### 6.2.3 Effects of the Kuroshio dynamics on sedimentary oxygenation

The Kuroshio Current, one of the main drivers of vertical mixing, has been identified as the key factor in controlling modern deep ventilation in the ~~Okinawa Trough~~OT (Kao et al., 2006). However, the flow path of the Kuroshio in the ~~Okinawa Trough~~OT during the glacial interval remains a matter of debate. Planktic foraminiferal assemblages in sediment cores from inside and outside the ~~Okinawa~~

域代码已更改

域代码已更改

带格式的：下标

域代码已更改

域代码已更改

域代码已更改

域代码已更改

588 ~~Trough~~OT indicated that the Kuroshio have migrated to the east of the Ryukyu  
589 Islands during the LGM (Ujiié and Ujiié, 1999). Subsequently, Kao et al. (2006)  
590 based on modeling results suggested that the Kuroshio still enters into the ~~Okinawa~~  
591 ~~Trough~~OT, but the volume transport was reduced by 43% compared to the  
592 present-day transport and the outlet of Kuroshio switches from the Tokara Strait to the  
593 Kerama Gap at -80 and -135m lowered sea level. Combined with sea surface  
594 temperature (SST) records and ocean model results, Lee et al. (2013) argued that there  
595 was little effect of deglacial sea-level change on the path of the Kuroshio, which still  
596 exited the ~~Okinawa-Trough~~OT from the Tokara Strait during the glacial period.  
597 Because the main stream of the Kuroshio Current is at a water depth of ~150 m, the  
598 SST records are insufficient to decipher past changes of the Kuroshio (Ujiié et al.,  
599 2016). On the other hand, low abundances of *P. obliquiloculata* in core CSH1 in the  
600 northern OT (Figure 6e) indicate that the main flow path of the Kuroshio may have  
601 migrated to the east of the Ryukyu Island (Shi et al., 2014). Such a flow change would  
602 have been caused by the proposed block of the Ryukyu-Taiwan land bridge by low  
603 sea level (Ujiié and Ujiié, 1999) and an overall reduced Kuroshio intensity (Kao et al.,  
604 2006), effectively suppressing the effect of the Kuroshio on deep ventilation in the OT.  
605 Our RSEs data show that oxygenated sedimentary conditions were dominant in the  
606 northern OT throughout the last glacial period (Figures 6a, b, c, d). The Kuroshio thus  
607 likely had a weak or even no effect on the renewal of oxygen to the sedimentary  
608 environment during the last glacial period. More recently, lower hydrothermal total  
609 Hg concentration during 20 ka - 9.6 ka, associated with reduced intensity and/or  
610 variation in flow path of KC, relative to that of Holocene recorded in core KX12 - 3  
611 (1423 water depth) (Lim et al., 2017), further validates our inference (Lim et al.,  
612 2017).  
613 On the other hand, the gradually ~~increasing~~increased alkenone-derived SST and  
614 abundance of *P.obliquiloculata* (Figures 6d and 6e) from 15 ka onwards indicates an  
615 intensified Kuroshio Current. ~~At present, mooring and float observations revealed~~  
616 that the KC penetrates to 1200 m isobath in the East China Sea (Andres et al., 2015).  
617 ~~Matsumoto et al. (2002) suggested that the influence of the present Kuroshio can~~

域代码已更改

reach to the bottom depth of the permanent thermocline, which is approximately at 1000 m water depth. However, as mentioned above, the effect of Kuroshio on the sedimentary oxygenation was likely very limited during the glacial period and only gradually increasing throughout the last glacial termination. Therefore, while its effect on our observed deglacial variation in oxygenation may provide a slowly changing background condition in vertical mixing effects on the sedimentary oxygenation in the OT, it cannot account for the first order, rapid oxygenation changes, including indications for millennial-scale variations, that we observe between 18 ka and 9 ka, including indications for millennial-scale variations (Figure 6).

Better oxygenated sedimentary conditions since 8.5 ka coincided with intensified Kuroshio (Li et al., 2005; Shi et al., 2014), as indicated by rapidly increased SST and *P. obliquiloculata* abundance in core CSH1 (Figures 6d and 6e) and *C. hyaline* abundance in core E017 (Figure 6i). The re-entrance of the Kuroshio into the OT (Shi et al., 2014) with rising eustatic sea level likely enhanced the vertical mixing and exchange between bottom and surface waters, ventilating the deep water in the OT. Previous comparative studies based on epibenthic  $\delta^{13}\text{C}$  values indicated well-ventilated deep water feeding both inside the OT and outside off the Ryukyu Islands during the Holocene (Kubota et al., 2015; Wahyudi and Minagawa, 1997). In summary, during the Holocene our observed enhanced sedimentary oxygenation regime observed in the OT during the Holocene is mainly related to the intensified Kuroshio, while the effect of the Kuroshio on OT oxygenation was limited before 15 ka.

#### 6.2.4. Effects of GNPIW on sedimentary oxygenation

Relatively stronger oxygenated Glacial North Pacific Intermediate Water (GNPIW), coined by (Matsumoto et al., 2002), has been widely documented in the Bering Sea (Itaki et al., 2012; Kim et al., 2011; Rella et al., 2012), the Okhotsk Sea (Itaki et al., 2008; Okazaki et al., 2014; Okazaki et al., 2006; Wu et al., 2014), off east Japan (Shibahara et al., 2007), the eastern North Pacific (Cartapanis et al., 2011; Ohkushi et al., 2013) and western subarctic Pacific (Keigwin, 1998; Matsumoto et al., 2002). The intensified ventilation-formation of GNPIW due to the displacement of

域代码已更改

带格式的：字体：倾斜

域代码已更改

域代码已更改

域代码已更改

域代码已更改

域代码已更改

域代码已更改

域代码已更改

域代码已更改



648 ~~source region to the Bering Sea is firstly attributable to~~ was proposed by the  
 649 ~~displacement of formation source region to the Bering Sea~~ Ohkushi et al. (2003) and  
 650 ~~then and then is further~~ confirmed by Horikawa et al. (2010). Under such conditions,  
 651 the invasion of well-ventilated GNPIW into the OT through the Kerama Gap would  
 652 have replenished the water column oxygen in the OT, although the penetration depth  
 653 of GNPIW remains under debate (Jaccard and Galbraith, 2013; Okazaki et al., 2010;  
 654 Rae et al., 2014). Both a gradual decrease in excess U concentration and an increase  
 655 in Mo/Mn ratio during the last glacial period (25 ~~ka~~-50 ka) validate such inference,  
 656 suggesting pronounced effects of intensified GNPIW formation in the OT.

657 During HS1, a stronger formation of GNPIW was supported by proxy studies  
 658 and numerical simulations(~~Chikamoto et al., 2012; Gong et al., 2019; Jaccard and~~  
 659 ~~Galbraith, 2013; Max et al., 2014; Okazaki et al., 2010).~~ recorded in the North Pacific  
 660 by a variety of studies.For example, ~~On the basis of paired benthic-planktic (B-P)~~  
 661 ~~<sup>14</sup>C data, and model simulations, nhanced penetration of~~ Okazaki et al. (2010)  
 662 suggested that NPIW penetrated into a much deeper water depth ~~of ~2500 to 3000 m~~  
 663 during HS1 relative to the Holocene has been revealed in several studies (Max et al.,  
 664 2014; Okazaki et al., 2010; Sagawa and Ikehara, 2008), which was also simulated by  
 665 several models (Chikamoto et al., 2012; Gong et al., 2019; Okazaki et al., 2010). On  
 666 the other hand, increased intermediate water temperature in the subtropical Pacific  
 667 recorded in core GH08-2004 (1166 m water depth) (Kubota et al., 2015) and young  
 668 deep water observed in the northern South China Sea during HS1 (Wan and Jian,  
 669 2014) along downstream region of NPIW are also related to intensified NPIW  
 670 formation. Furthermore, In contrast, Max et al. (2014) argued against deep water  
 671 formation in the North Pacific and showed that GNPIW was well ventilated only to  
 672 intermediate water depths (< 1400 m). Various mid- and high latitude North Pacific  
 673 records of B-P <sup>14</sup>C age offsets at the intermediate water depth (<600–2000 m) showed  
 674 an active production of GNPIW during HS1 (Max et al., 2014; Sagawa and Ikehara,  
 675 2008). (Kubota et al., 2015)Moreover, Kubota et al. (2010) reported increased  
 676 subsurface water temperatures related to enhanced GNPIW contributions during HS1  
 677 at a water depth of 1166m (GH08, and young deep water was observed in the northern

域代码已更改



678 ~~South China Sea during HS1 (Wan and Jian, 2014).~~  
679 ~~All these multiple lines of evidence imply the presence of well ventilated~~  
680 ~~intermediate water in the upper 2000 m of the North Pacific during HS1. At this point,~~  
681 ~~the effect of a strong GNPIW likely reached the South China Sea (Wan and Jian, 2014;~~  
682 ~~Zheng et al., 2016), further to the south the Okinawa Trough. The pathway of~~  
683 GNPIW from numerical model simulations (Zheng et al., 2016) was similar to  
684 modern observations (You, 2003). Thus, all these evidence imply a persistent, cause  
685 and effect relation ~~has been established~~ between GNPIW ventilation, the intermediate  
686 and deep water oxygen concentration ~~in the of OT deepwater~~ and sediment redox state  
687 during HS1. In addition, our RSEs data also suggested a similarly enhanced  
688 ventilation in HS2 (Figures 6b and 6c) (Figure 6) that ~~must is also also be~~ attributed to  
689 intensified GNPIW.

690 Hypoxic conditions during ~~the Bølling-Allerød (B/A)~~ have been also widely  
691 observed in the mid- and high-latitude North Pacific (Jaccard and Galbraith, 2012;  
692 Praetorius et al., 2015). Our data, ~~both of~~ excess U concentrations and Mo/Mn ratio  
693 recorded in core CSH1 (Figures 6b- ~~and 6c~~), together with enhanced denitrification  
694 and *B. aculeata* abundance (Figures 6f and 6h), further reveal the expansion of  
695 oxygen-depletion at mid-depth waters down to the subtropical NW Pacific during the  
696 late deglacial period. Based on high relative abundances of radiolarian species,  
697 indicators of upper intermediate water ventilation in core PC-23A, Itaki et al. (2012)  
698 suggested that a presence of well-ventilated waters was limited to the upper  
699 intermediate layer (200 m–500 m) in the Bering Sea during warm periods, such as the  
700 B/A and Preboreal. Higher B-P foraminiferal <sup>14</sup>C ages, together with increased  
701 temperature and salinity at intermediate waters ~~temperature and salinity~~ recorded in  
702 core GH02-1030 (off East Japan) supported a weakened formation of NPIW during  
703 the B/A (Sagawa and Ikehara, 2008). These lines of evidence indicate that the  
704 boundary between GNPIW and North Pacific Deep Water shoaled during the B/A, in  
705 comparison to HS1. Based on a comparison of two benthic foraminiferal oxygen and  
706 carbon isotope records from off northern Japan and the southern Ryukyu Island,  
707 Kubota et al. (2015) found a stronger influence of Pacific Deep Water on

域代码已更改  
域代码已更改

域代码已更改  
域代码已更改  
域代码已更改

域代码已更改

域代码已更改

域代码已更改

带格式的：字体：倾斜

域代码已更改

域代码已更改

域代码已更改  
域代码已更改

intermediate-water temperature and ventilation at their southern than the northern locations, although both sites are located at similar water depths (1166 m and -1212 m for cores GH08-2004 and GH02-1030, 1212 m, respectively). Higher excess U concentration and low Mo/Mn ratio in our core CSH1 during the B/A and Preboreal suggest reduced sedimentary oxygenation, consistent with reduced ventilation of GNPIW, contributing to the subsurface water suboxia-deoxygenation in the OT.

During the YD, both Mo/Mn ratio and excess U show a slightly decreased oxygen condition in the northern OT. In-By contrast, benthic foraminiferal  $\delta^{18}\text{O}$  and  $\delta^{13}\text{C}$  values in a sediment core collected from the Oyashio region suggested a strengthened formation and ventilation of GNPIW during the YD (Ohkushi et al., 2016). This pattern possibly indicates a time-dependent, varying contribution of distal GNPIW to the deglacial OT oxygenation history, and we presume a more pronounced contribution of organic matter degradation due to high export productivity during this period, as suggested by increasing  $\text{CaCO}_3$  content.

### 6.3. Subtropical North Pacific ventilation links to North Atlantic Climate

One of the characteristics climate features in the Northern Hemisphere, in particular the North Atlantic is millennial-scale oscillations during the glacial and deglacial periods. These abrupt climatic events have been widely thought to be related to varying strength of Atlantic Meridional Overturning Circulation (AMOC) (Lynch-Stieglitz, 2017). One of dynamic proxies of ocean circulation,  $^{231}\text{Pa}/^{230}\text{Th}$  reveals that severe weakening of AMOC only existed during Heinrich stadials due to increased freshwater discharges into the North Atlantic (Böhm et al., 2015; McManus et al., 2004). On the other hand, several mechanisms, such as sudden termination of freshwater input (Liu et al., 2009), atmospheric  $\text{CO}_2$  concentration (Zhang et al., 2017), enhanced advection of salt (Barker et al., 2010) (Liu et al., 2009) and changes in background climate (Knorr and Lohmann, 2007) were proposed to explain the reinvigoration of AMOC during the B/A.

Our RSEs data in the Northern OT and epibenthic  $\delta^{13}\text{C}$  in the Bering Sea (Figures 7a-c) both show a substantial millennial variability in intermediate water ventilation in the subtropical North Pacific. Notably, both enhanced ventilation during

域代码已更改

带格式的：字体：小四

带格式的：缩进：首行缩进： 2 字符

带格式的：字体：小四

域代码已更改

带格式的：字体：小四

域代码已更改

域代码已更改

带格式的：下标

域代码已更改

域代码已更改

域代码已更改

域代码已更改

域代码已更改

带格式的：字体：(默认) Times New Roman, (中文) + 中文正文

带格式的：上标

738 HS1 and HS2 and oxygen-poor condition during the B/A respectively correspond to  
 739 the collapse and resumption of ~~Atlantic meridional overturning circulation (AMOC)~~  
 740 ~~(Bohm et al., 2015; McManus et al., 2004)~~ (Figure 7-d). ~~Such out-of-phase~~  
 741 ~~millennial-scale pattern~~ This is consistent with the results of various modeling  
 742 simulations (Chikamoto et al., 2012; Menviel et al., 2014; Okazaki et al., 2010;  
 743 Saenko et al., 2004), although these models had different ~~scenarios-boundary~~  
 744 ~~conditions~~ and causes for the observed effects in GNPIW formation, and ventilation  
 745 ages derived from B-P  $^{14}\text{C}$  (Freeman et al., 2015; Max et al., 2014; Okazaki et al.,  
 746 2012). These lines of evidence ~~reveal-confirm~~ a persistent link between the ventilation  
 747 of North Pacific and the North Atlantic climate (Lohmann et al., 2019). Such links  
 748 have also been corroborated by ~~using~~ proxy data and modeling experiment between  
 749 AMOC and East Asian monsoon during the 8.2 ka event (Liu et al., 2013), the  
 750 Holocene (Wang et al., 2005) and 34 ~~ka~~-60 ka (Sun et al., 2012). The mechanism  
 751 linking East Asia with North Atlantic has been attributed to an atmospheric  
 752 teleconnection, such as the position and strength of Westerly Jet and  
 753 Mongolia-Siberian High (Porter and Zhisheng, 1995). However, the mechanism  
 754 behind such ~~oceanic ventilation-seesaw-out-of-phase~~ pattern between the ~~ventilation~~  
 755 ~~in the subtropical North Pacific and the~~ North Atlantic ~~deep water formation and~~  
 756 ~~North Pacific is still remains~~ unclear.

757 Increased NPIW formation ~~of-during~~ HS1 may have been caused by enhanced  
 758 salinity-driven vertical mixing through higher meridional water mass transport from  
 759 the subtropical Pacific. Previous studies have proposed that intermediate water  
 760 formation in the North Pacific hinged on a basin-wide increase in sea surface salinity  
 761 driven by changes in strength of the summer EAM and the moisture transport from  
 762 the Atlantic to the Pacific (Emile-Geay et al., 2003). Several modeling studies found  
 763 that freshwater forcing in the North Atlantic could cause a widespread surface  
 764 salinification in the subtropical Pacific Ocean (Menviel et al., 2014; Okazaki et al.,  
 765 2010; Saenko et al., 2004). This idea has been tested by proxy data (Rodríguez-Sanz  
 766 et al., 2013; Sagawa and Ikehara, 2008), which indicated a weakened summer EAM  
 767 and reduced transport of moisture from Atlantic to Pacific through Panama Isthmus

域代码已更改

768 | owing to the southward displacement of Intertropical Convergence Zone ~~ICZ~~ caused  
769 | by a weakening of AMOC. Along with this process, as predicted through a general  
770 | circulation modeling, a strengthened Pacific Meridional Overturning Circulation  
771 | would have transported more warm and salty subtropical water into the high-latitude  
772 | North Pacific (Okazaki et al., 2010). In accordance with comprehensive Mg/Ca  
773 | ratio-based salinity reconstructions, however, Riethdorf et al. (2013) found no clear  
774 | evidence for such higher salinity patterns in the subarctic northwest Pacific during  
775 | HS1.

域代码已更改

域代码已更改

776 | On the other hand, a weakened AMOC would deepen the wintertime Aleutian  
777 | Low based on modern observation (Okumura et al., 2009), which is closely related to  
778 | the sea ice formation in the marginal seas of the subarctic Pacific (Cavalieri and  
779 | Parkinson, 1987). Once stronger Aleutian Low, Intense-intense brine rejection due to;  
780 | ~~accompanied by expanded~~ sea ice expansionformation, would have enhanced the  
781 | NPIW formation. Recently our modeling-derived evidence suggests-confirms that  
782 | enhanced sea ice coverage occurred in the southern Okhotsk Sea and off East  
783 | Kamchatka Peninsula during HS1 (Gong et al., 2019). In addition, higher-stronger  
784 | advection of low-salinity water via the Alaskan Stream to the subarctic NW Pacific  
785 | was probably enhanced during HS1, related to a shift of the Aleutian Low pressure  
786 | system over the North Pacific, which could also increase sea ice formation, brine  
787 | rejection and thereafter intermediate water ventilation (Riethdorf et al., 2013).

域代码已更改

域代码已更改

域代码已更改

域代码已更改

788 | During the late deglaciation, ameliorating global climate conditions, such as  
789 | warming Northern Hemisphere, and a strengthened Asian summer monsoon, are a  
790 | result of changes in insolation forcing, greenhouse gases concentrations, and variable  
791 | strengths of the AMOC (Clark et al., 2012; Liu et al., 2009). During the B/A, a  
792 | decrease in sea ice extent and duration, as well as reduced advection of Alaska Stream  
793 | waters were indicated by combined reconstructions of SST and mixed layer  
794 | temperatures from the subarctic Pacific (Riethdorf et al., 2013). At that time, the  
795 | rising eustatic sea level (Spratt and Lisiecki, 2016) would have supported the  
796 | intrusion of Alaska Stream into the Bering Sea by deepening and opening glacial  
797 | closed straits of the Aleutian Islands chain, while reducing the advection of the Alaska

域代码已更改

Stream to the subarctic Pacific gyre (Riethdorf et al., 2013). In this scenario, saltier and more stratified surface water conditions would have inhibited brine rejection and subsequent formation and ventilation of NPIW (Lam et al., 2013), leading to a reorganization of the Pacific water mass, closely coupled to the collapse and resumption modes of the AMOC during these two intervals.

#### 6.4 Increased storage of CO<sub>2</sub> at mid-depth water in the North Pacific at the B/A

One of the striking features of RSEs data is higher Mo/Mn ratios and excess U concentrations at the B/A, ~~indicating supporting an expansion of Oxygen Minimum Zone~~ ~~a substantial oxygen poor condition~~ in the ~~subtropical~~ North Pacific (Galbraith and Jaccard, 2015; Jaccard and Galbraith, 2012; Moffitt et al., 2015) and ~~coinciding~~ with the termination of atmospheric CO<sub>2</sub> concentration rise (Marcott et al., 2014) (Figure 7a7e). As described above, it can be related to the upwelling of nutrient- and CO<sub>2</sub>-rich Pacific Deep Water due to resumption of AMOC and enhanced export production. Although here we are unable to distinguish these two reasons from each other, boron isotope data measured on surface-dwelling foraminifera in core MD01-2416 situated in the western subarctic North Pacific did reveal a decrease in near-surface pH and an increase in pCO<sub>2</sub> at this time (Gray et al., 2018). That is to say, subarctic North Pacific is a source of relatively high atmospheric CO<sub>2</sub> concentration at the B/A. Here we cannot conclude that the same processes could have occurred in the subtropical North Pacific due to the lack of well-known drivers to draw out of the old carbon in the deep sea into the atmosphere. However, an expansion of oxygen-depletion zone in the entire North Pacific suggest an increase in respired carbon storage at intermediate-depth in the subtropical North Pacific, which likely stalls the rise of atmospheric CO<sub>2</sub>. Our results support the findings by Galbraith et al. (2007) and are consistent with the hypothesis of deglacial flushing of respired carbon dioxide from an isolated, deep ocean reservoir (Marchitto et al., 2007; Sigman and Boyle, 2000). Given the sizeable volume of the North Pacific, potentially, once the respired carbon could be emitted to the atmosphere in stages, which would play an important role in propelling the Earth out of the last ice age (Jaccard and Galbraith, 2018).

## 7. Conclusions

Our geochemical results of sediment core CSH1 revealed substantial changes in intermediate water redox conditions in the northern Okinawa Trough over the last 50 ka on orbital and millennial timescales ~~in the past~~. Enhanced sedimentary oxygenation mainly occurred during cold intervals, such as the last glacial period, Heinrich stadials 1 and 2, and during the middle and late Holocene, while diminished sedimentary oxygenation prevailed during the Bölling-Alleröd and Preboreal. The sedimentary oxygenation variability presented here provides key evidence for the substantial impact of ventilation of NPIW on the sedimentary oxygenation in the subtropical North Pacific and ~~highlights shows out-of-phase pattern with North Atlantic Climate during the last deglaciation the major role of Atlantic Meridional Overturning Circulation in regulating the variations in sedimentary oxygenation in the Okinawa Trough through ventilation of NPIW.~~ The linkage is attributable to the disruption of NPIW formation caused by climate changes in the North Atlantic, which is transferred to the North Pacific via atmospheric and oceanic teleconnections. ~~Combined with other published records,~~ We also suggest an expansion of oxygen-depleted zone and accumulation of respired carbon at the mid-depth waters of the North Pacific ~~at during~~ the B/A, coinciding with the termination of atmospheric CO<sub>2</sub> rise. A step-wise injection of such respired carbon into the atmosphere, mechanism likely to propel the Earth out of glacial climate, would be helpful to maintain high atmospheric CO<sub>2</sub> levels during the deglaciation.

带格式的：字体：小四

带格式的：字体：小四，下标

带格式的：字体：小四

~~Once the release of the sequestered carbon into the atmosphere in stages, it would be helpful to maintain high atmospheric CO<sub>2</sub> levels during the deglaciation and to propel the earth out of the glacial climate.~~

**Data availability.** All raw data are available to all interested researchers upon request.

**Author Contributions.** J.J.Z. and X.F.S. conceived the study. A.M.Z. performed geochemical analyses of bulk sediments. J.J.Z., X.F.S. K.S. and X.G. led the write up of the manuscript. All other authors provided comments on the manuscript and

contributed to the final version of the manuscript.

**Competing interests:** The authors declare no competing interests.

## Acknowledgements

Financial support was provided by the National Program on Global Change and Air-Sea Interaction (GASI-GEOGE-04), by the National Natural Science Foundation of China (Grant Nos.: 41476056, 41876065, 41420104005, 41206059, and U1606401) and by the Basic Scientific Fund for National Public Research Institutes of China (No.2016Q09) and International Cooperative Projects in Polar Study (201613) and Taishan Scholars Program of Shandong. This study is a contribution to the bilateral Sino-German collaboration project (funding through BMBF grant 03F0704A – SIGEPAX). XG, LLJ, GL, RT thank the bilateral Sino-German collaboration NOPAWAC project (BMBF grant No. 03F0785A). LLJ and RT acknowledge financial support through the national Helmholtz REKLIM Initiative. We would like to thank the anonymous reviewers, who helped to improve the quality of this manuscript. The data used in this study are available from the authors upon request (zoujianjun@fio.org.cn).

## References

- Addison, J. A., Finney, B. P., Dean, W. E., Davies, M. H., Mix, A. C., Stoner, J. S., and Jaeger, J. M.: Productivity and sedimentary  $\delta^{15}\text{N}$  variability for the last 17,000 years along the northern Gulf of Alaska continental slope, *Paleoceanography*, 27, PA1206, doi:10.1029/2011PA002161, 2012.
- Algeo, T. J.: Can marine anoxic events draw down the trace element inventory of seawater?, *Geology*, 32, 1057-1060, 2004.
- Algeo, T. J. and Lyons, T. W.: Mo-total organic carbon covariation in modern anoxic marine environments: Implications for analysis of paleoredox and paleohydrographic conditions, *Paleoceanography*, 21, PA1016, doi: 10.1029/2004pa001112, 2006.
- Algeo, T. J. and Tribouillard, N.: Environmental analysis of paleoceanographic systems based on molybdenum – uranium covariation, *Chemical Geology*, 268, 211-225, 2009.
- Andres, M., Jan, S., Sanford, T. B., Mensah, V., Centurioni, L. R., and Book, J. W.: Mean structure and variability of the Kuroshio from northeastern Taiwan to southwestern Japan, *Oceanography*, 26, 84–95, 2015.
- Böhm, E., Lippold, J., Gutjahr, M., Frank, M., Blaser, P., Antz, B., Fohlmeister, J., Frank, N., Andersen,

域代码已更改

892 M. B., and Deiningner, M.: Strong and deep Atlantic meridional overturning circulation during the last  
893 glacial cycle, *Nature*, 517, 73-76, 2015.

894 Barker, S., Knorr, G., Vautravers, M. J., Diz, P., and Skinner, L. C.: Extreme deepening of the Atlantic  
895 overturning circulation during deglaciation, *Nature Geoscience*, 3, 567-571, 2010.

896 Bianchi, D., Dunne, J. P., Sarmiento, J. L., and Galbraith, E. D.: Data-based estimates of suboxia,  
897 denitrification, and N<sub>2</sub>O production in the ocean and their sensitivities to dissolved O<sub>2</sub>, *Global*  
898 *Biogeochemical Cycles*, 26, doi:10.1029/2011gb004209, 2012.

899 Brewer, P. G. and Peltzer, E. T.: Ocean chemistry, ocean warming, and emerging hypoxia: Commentary,  
900 *Journal of Geophysical Research: Oceans*, 121, 3659-3667, 2016.

901 Burdige, D. J.: The biogeochemistry of manganese and iron reduction in marine sediments,  
902 *Earth-Science Reviews*, 35, 249-284, 1993.

903 Cannariato, K. G. and Kennett, J. P.: Climatically related millennial-scale fluctuations in strength of  
904 California margin oxygen-minimum zone during the past 60 k.y, *Geology*, 27, 975-978, 1999.

905 Cartapanis, O., Tachikawa, K., and Bard, E.: Northeastern Pacific oxygen minimum zone variability  
906 over the past 70 kyr: Impact of biological production and oceanic ventilation, *Paleoceanography*, 26,  
907 PA4208, doi: 4210.1029/2011PA002126, 2011.

908 Cavalieri, D. J. and Parkinson, C. L.: On the relationship between atmospheric circulation and the  
909 fluctuations in the sea ice extents of the bering and okhotsk seas, *Journal of Geophysical*  
910 *Research-Oceans*, 92, 7141-7162, 1987.

911 Chang, A. S., Pedersen, T. F., and Hendy, I. L.: Effects of productivity, glaciation, and ventilation on  
912 late Quaternary sedimentary redox and trace element accumulation on the Vancouver Island margin,  
913 western Canada, *Paleoceanography*, 29, doi: 10.1002/2013PA002581, 2014.

914 Chang, Y.-P., Chen, M.-T., Yokoyama, Y., Matsuzaki, H., Thompson, W. G., Kao, S.-J., and Kawahata,  
915 H.: Monsoon hydrography and productivity changes in the East China Sea during the past 100,000  
916 years: Okinawa Trough evidence (MD012404), *Paleoceanography*, 24, PA3208, doi:  
917 3210.1029/2007PA001577, 2009.

918 Chen, J., Zhang, D., Zhang, W., and Li, T.: The paleoclimatic change since the last galciation in the  
919 north of Okinawa Trough based on the spore-pollen records, *Acta Oceanologica Sinica*, 28, 85-91(in  
920 Chinese with English Abstract), 2006.

921 Cheng, H., Edwards, R. L., Sinha, A., Spötl, C., Yi, L., Chen, S., Kelly, M., Kathayat, G., Wang, X., Li,  
922 X., Kong, X., Wang, Y., Ning, Y., and Zhang, H.: The Asian monsoon over the past 640,000 years and  
923 ice age terminations, *Nature*, 534, 640-646, 2016.

924 Cheng, H., Edwards, R. L., Southon, J., Matsumoto, K., Feinberg, J. M., Sinha, A., Zhou, W., Li, H., Li,  
925 X., Xu, Y., Chen, S., Tan, M., Wang, Q., Wang, Y., and Ning, Y.: Atmospheric 14C/12C changes during  
926 the last glacial period from Hulu Cave, *Science*, 362, 1293-1297, 2018.

927 Chikamoto, M. O., Menviel, L., Abe-Ouchi, A., Ohgaito, R., Timmermann, A., Okazaki, Y., Harada, N.,  
928 Oka, A., and Mouchet, A.: Variability in North Pacific intermediate and deep water ventilation during  
929 Heinrich events in two coupled climate models, *Deep Sea Research Part II: Topical Studies in*  
930 *Oceanography*, 61-64, 114-126, 2012.

931 Clark, P. U., Shakun, J. D., Baker, P. A., Bartlein, P. J., Brewer, S., Brook, E., Carlson, A. E., Cheng, H.,  
932 Kaufman, D. S., Liu, Z., Marchitto, T. M., Mix, A. C., Morrill, C., Otto-Bliesner, B. L., Pahnke, K.,  
933 Russell, J. M., Whitlock, C., Adkins, J. F., Blois, J. L., Clark, J., Colman, S. M., Curry, W. B., Flower,  
934 B. P., He, F., Johnson, T. C., Lynch-Stieglitz, J., Markgraf, V., McManus, J., Mitrovica, J. X., Moreno, P.  
935 I., and Williams, J. W.: Global climate evolution during the last deglaciation, *Proceedings of the*



936 National Academy of Sciences of the United States of America, 109, E1134-E1142, 2012.

937 Clemens, S. C., Holbourn, A., Kubota, Y., Lee, K. E., Liu, Z., Chen, G., Nelson, A., and Fox-Kemper,  
938 B.: Precession-band variance missing from East Asian monsoon runoff, *Nature Communications*, 9,  
939 3364, doi: 3310.1038/s41467-41018-05814-41460, 2018.

940 Crusius, J., Calvert, S., Pedersen, T., and Sage, D.: Rhenium and molybdenum enrichments in  
941 sediments as indicators of oxic, suboxic and sulfidic conditions of deposition, *Earth and Planetary  
942 Science Letters*, 145, 65-78, 1996.

943 Crusius, J., Pedersen, T. F., Kienast, S., Keigwin, L., and Labeyrie, L.: Influence of northwest Pacific  
944 productivity on North Pacific Intermediate Water oxygen concentrations during the Boiling-Allerod  
945 interval (14.7-12.9 ka), *Geology*, 32, 633-636, 2004.

946 Dahl, T. W., Anbar, A. D., Gordon, G. W., Rosing, M. T., Frei, R., and Canfield, D. E.: The behavior of  
947 molybdenum and its isotopes across the chemocline and in the sediments of sulfidic Lake Cadagno,  
948 Switzerland, *Geochimica et Cosmochimica Acta*, 74, 144-163, 2010.

949 Dean, W. E., Gardner, J. V., and Piper, D. Z.: Inorganic geochemical indicators of glacial-interglacial  
950 changes in productivity and anoxia on the California continental margin, *Geochimica et Cosmochimica  
951 Acta*, 61, 4507-4518, 1997.

952 Delcroix, T. and Murtugudde, R.: Sea surface salinity changes in the East China Sea during 1997–2001:  
953 Influence of the Yangtze River, *Journal of Geophysical Research: Oceans*, 107, 8008,  
954 doi:8010.1029/2001JC000893, 2002.

955 Dou, Y., Yang, S., Li, C., Shi, X., Liu, J., and Bi, L.: Deepwater redox changes in the southern Okinawa  
956 Trough since the last glacial maximum, *Progress in Oceanography*, 135, 77-90, 2015.

957 Emile-Geay, J., Cane, M. A., Naik, N., Seager, R., Clement, A. C., and van Geen, A.: Warren revisited:  
958 Atmospheric freshwater fluxes and “Why is no deep water formed in the North Pacific”, *Journal of  
959 Geophysical Research: Oceans*, 108, doi:10.1029/2001JC001058, 2003.

960 Freeman, E., Skinner, L. C., Tisserand, A., Dokken, T., Timmermann, A., Menviel, L., and Friedrich, T.:  
961 An Atlantic–Pacific ventilation seesaw across the last deglaciation, *Earth and Planetary Science Letters*,  
962 424, 237-244, 2015.

963 Galbraith, E. D. and Jaccard, S. L.: Deglacial weakening of the oceanic soft tissue pump: global  
964 constraints from sedimentary nitrogen isotopes and oxygenation proxies, *Quaternary Science Reviews*,  
965 109, 38-48, 2015.

966 Galbraith, E. D., Jaccard, S. L., Pedersen, T. F., Sigman, D. M., Haug, G. H., Cook, M., Southon, J. R.,  
967 and Francois, R.: Carbon dioxide release from the North Pacific abyss during the last deglaciation,  
968 *Nature*, 449, 890-893, 2007.

969 Galbraith, E. D., Kienast, M., Pedersen, T. F., and Calvert, S. E.: Glacial-interglacial modulation of the  
970 marine nitrogen cycle by high-latitude O<sub>2</sub> supply to the global thermocline, *Paleoceanography*, 19,  
971 PA4007, doi:4010.1029/2003PA001000, 2004.

972 Ge, S., Shi, X., Wu, Y., Lee, T., Xiong, Y., and Saito, Y.: Rock magnetic property of gravity core CSH1  
973 from the northern Okinawa Trough and the effect of early diagenesis, *Acta Oceanologica Sinica*, 26,  
974 54-65, 2007.

975 Gong, X., Lembke-Jene, L., Lohmann, G., Knorr, G., Tiedemann, R., Zou, J. J., and Shi, X. F.:  
976 Enhanced North Pacific deep-ocean stratification by stronger intermediate water formation during  
977 Heinrich Stadial 1, *Nature Communications*, 10, 656, doi:610.1038/s41467-41019-08606-41462, 2019.

978 Gray, W. R., Rae, J. W. B., Wills, R. C. J., Shevenell, A. E., Taylor, B., Burke, A., Foster, G. L., and  
979 Lear, C. H.: Deglacial upwelling, productivity and CO<sub>2</sub> outgassing in the North Pacific Ocean, *Nature*

980 Geoscience, 11, 340-344, 2018.  
 981 Helz, G. R., Miller, C. V., Charnock, J. M., Mosselmans, J. F. W., Patrick, R. A. D., Garner, C. D., and  
 982 Vaughan, D. J.: Mechanism of molybdenum removal from the sea and its concentration in black shales:  
 983 EXAFS evidence, *Geochimica et Cosmochimica Acta*, 60, 3631-3642, 1996.  
 984 Hofmann, A. F., Peltzer, E. T., Walz, P. M., and Brewer, P. G.: Hypoxia by degrees: Establishing  
 985 definitions for a changing ocean, *Deep Sea Research Part I: Oceanographic Research Papers*, 58,  
 986 1212-1226, 2011.  
 987 Hoogakker, B. A. A., Elderfield, H., Schmiedl, G., McCave, I. N., and Rickaby, R. E. M.:  
 988 Glacial–interglacial changes in bottom-water oxygen content on the Portuguese margin, *Nature*  
 989 *Geoscience*, 8, 40-43, 2015.  
 990 Horikawa, K., Asahara, Y., Yamamoto, K., and Okazaki, Y.: Intermediate water formation in the Bering  
 991 Sea during glacial periods: Evidence from neodymium isotope ratios, *Geology*, 38, 435-438, 2010.  
 992 Ichikawa, H. and Beardsley, R. C.: The Current System in the Yellow and East China Seas, *Journal of*  
 993 *Oceanography*, 58, 77-92, 2002.  
 994 Itaki, T., Khim, B. K., and Ikehara, K.: Last glacial-Holocene water structure in the southwestern  
 995 Okhotsk Sea inferred from radiolarian assemblages, *Marine Micropaleontology*, 67, 191-215, 2008.  
 996 Itaki, T., Kim, S., Rella, S. F., Uchida, M., Tada, R., and Khim, B. K.: Millennial-scale variations of  
 997 late Pleistocene radiolarian assemblages in the Bering Sea related to environments in shallow and deep  
 998 waters, *Deep-Sea Research Part II-Topical Studies in Oceanography*, 61-64, 127-144, 2012.  
 999 Ivanochko, T. S. and Pedersen, T. F.: Determining the influences of Late Quaternary ventilation and  
 1000 productivity variations on Santa Barbara Basin sedimentary oxygenation: a multi-proxy approach,  
 1001 *Quaternary Science Reviews*, 23, 467-480, 2004.  
 1002 Jaccard, S. L. and Galbraith, E. D.: Direct ventilation of the North Pacific did not reach the deep ocean  
 1003 during the last deglaciation, *Geophysical Research Letters*, 40, 199-203, 2013.  
 1004 Jaccard, S. L. and Galbraith, E. D.: Large climate-driven changes of oceanic oxygen concentrations  
 1005 during the last deglaciation, *Nature Geoscience*, 5, 151-156, 2012.  
 1006 Jaccard, S. L. and Galbraith, E. D.: Push from the Pacific, *Nature Geoscience*, 11, 299-300, 2018.  
 1007 Jaccard, S. L., Galbraith, E. D., Martínez-García, A., and Anderson, R. F.: Covariation of deep  
 1008 Southern Ocean oxygenation and atmospheric CO<sub>2</sub> through the last ice age, *Nature*, 530, 207-210,  
 1009 2016.  
 1010 Jaccard, S. L., Galbraith, E. D., Sigman, D. M., Haug, G. H., Francois, R., Pedersen, T. F., Dulski, P.,  
 1011 and Thierstein, H. R.: Subarctic Pacific evidence for a glacial deepening of the oceanic respired carbon  
 1012 pool, *Earth and Planetary Science Letters*, 277, 156-165, 2009.  
 1013 Jian, Z. M., Chen, R. H., and Li, B. H.: Deep-sea benthic foraminiferal record of the paleoceanography  
 1014 in the southern Okinawa trough over the last 20000 years, *Science in China Series D-Earth Sciences*,  
 1015 39, 551-560, 1996.  
 1016 Kao, S. J., Horng, C. S., Hsu, S. C., Wei, K. Y., Chen, J., and Lin, Y. S.: Enhanced deepwater  
 1017 circulation and shift of sedimentary organic matter oxidation pathway in the Okinawa Trough since the  
 1018 Holocene, *Geophysical Research Letters*, 32, L15609, doi:10.1029/2005GL023139, 2005.  
 1019 Kao, S. J., Liu, K. K., Hsu, S. C., Chang, Y. P., and Dai, M. H.: North Pacific-wide spreading of  
 1020 isotopically heavy nitrogen during the last deglaciation: Evidence from the western Pacific,  
 1021 *Biogeosciences*, 5, 1641-1650, 2008.  
 1022 Kao, S. J., Wu, C.-R., Hsin, Y.-C., and Dai, M.: Effects of sea level change on the upstream Kuroshio  
 1023 Current through the Okinawa Trough, *Geophysical Research Letters*, 33, L16604,

doi:10.1029/2006gl026822, 2006.

Keigwin, L. D.: Glacial-age hydrography of the far northwest Pacific Ocean, *Paleoceanography*, 13, 323-339, 1998.

Kim, S., Khim, B. K., Uchida, M., Itaki, T., and Tada, R.: Millennial-scale paleoceanographic events and implication for the intermediate-water ventilation in the northern slope area of the Bering Sea during the last 71 kyrs, *Global and Planetary Change*, 79, 89-98, 2011.

Klinkhammer, G. P. and Palmer, M. R.: Uranium in the oceans: Where it goes and why, *Geochimica et Cosmochimica Acta*, 55, 1799-1806, 1991.

Knorr, G. and Lohmann, G.: Rapid transitions in the Atlantic thermohaline circulation triggered by global warming and meltwater during the last deglaciation, *Geochemistry, Geophysics, Geosystems*, 8, DOI: 10.1029/2007gc001604, 2007.

Kohfeld, K. E. and Chase, Z.: Controls on deglacial changes in biogenic fluxes in the North Pacific Ocean, *Quaternary Science Reviews*, 30, 3350-3363, 2011.

Kubota, Y., Kimoto, K., Itaki, T., Yokoyama, Y., Miyairi, Y., and Matsuzaki, H.: Bottom water variability in the subtropical northwestern Pacific from 26 kyr BP to present based on Mg/Ca and stable carbon and oxygen isotopes of benthic foraminifera, *Climate of the Past*, 11, 803-824, 2015.

Kubota, Y., Kimoto, K., Tada, R., Oda, H., Yokoyama, Y., and Matsuzaki, H.: Variations of East Asian summer monsoon since the last deglaciation based on Mg/Ca and oxygen isotope of planktic foraminifera in the northern East China Sea, *Paleoceanography*, 25, PA4205, doi:10.1029/2009pa001891, 2010.

Lam, P. J., Robinson, L. F., Blusztajn, J., Li, C., Cook, M. S., McManus, J. F., and Keigwin, L. D.: Transient stratification as the cause of the North Pacific productivity spike during deglaciation, *Nature Geosci*, 6, 622-626, 2013.

Lee, K. E., Lee, H. J., Park, J.-H., Chang, Y.-P., Ikehara, K., Itaki, T., and Kwon, H. K.: Stability of the Kuroshio path with respect to glacial sea level lowering, *Geophysical Research Letters*, 40, 392-396, doi:10.1002/grl.50102, 2013.

Lembke-Jene, L., Tiedemann, R., Nürnberg, D., Kokfelt, U., Kozdon, R., Max, L., Röhl, U., and Gorbarenko, S. A.: Deglacial variability in Okhotsk Sea Intermediate Water ventilation and biogeochemistry: Implications for North Pacific nutrient supply and productivity, *Quaternary Science Reviews*, 160, 116-137, 2017.

Li, D., Zheng, L.-W., Jaccard, S. L., Fang, T.-H., Paytan, A., Zheng, X., Chang, Y.-P., and Kao, S.-J.: Millennial-scale ocean dynamics controlled export productivity in the subtropical North Pacific, *Geology*, 45, 651-654, 2017.

Li, T. G., Xiang, R., Sun, R. T., and Cao, Q. Y.: Benthic foraminifera and bottom water evolution in the middle-southern Okinawa Trough during the last 18 ka, *Science in China Series D-Earth Sciences*, 48, 805-814, 2005.

Li, Y. H. and Schoonmaker, J. E.: Chemical Composition and Mineralogy of Marine Sediments. In: *Treatise on Geochemistry (Second Edition)*, Turekian, K. K. (Ed.), Elsevier, Oxford, 2014.

Lim, D., Kim, J., Xu, Z., Jeong, K., and Jung, H.: New evidence for Kuroshio inflow and deepwater circulation in the Okinawa Trough, East China Sea: Sedimentary mercury variations over the last 20 kyr, *Paleoceanography*, 32, 571-579, 2017.

Liu, Y. H., Henderson, G. M., Hu, C. Y., Mason, A. J., Charnley, N., Johnson, K. R., and Xie, S. C.: Links between the East Asian monsoon and North Atlantic climate during the 8,200 year event, *Nature Geosci*, 6, 117-120, 2013.

1068 Liu, Z., Otto-Bliesner, B. L., He, F., Brady, E. C., Tomas, R., Clark, P. U., Carlson, A. E.,  
 1069 Lynch-Stieglitz, J., Curry, W., Brook, E., Erickson, D., Jacob, R., Kutzbach, J., and Cheng, J.: Transient  
 1070 Simulation of Last Deglaciation with a New Mechanism for Bølling-Allerød Warming, *Science*, 325,  
 1071 310-314, 2009.  
 1072 Lohmann, G., Lembke-Jene, L., Tiedemann, R., Gong, X., Scholz, P., Zou, J., and Shi, X.: Challenges  
 1073 in the Paleoclimatic Evolution of the Arctic and Subarctic Pacific since the Last Glacial Period—The  
 1074 Sino–German Pacific–Arctic Experiment (SiGePAX), *Challenges*, 10, 13, doi:10.3390/challe10010013,  
 1075 2019.  
 1076 Lynch-Stieglitz, J.: The Atlantic Meridional Overturning Circulation and Abrupt Climate Change,  
 1077 *Annual Review of Marine Science*, 9, 83-104, 2017.  
 1078 Lyons, T. W., Anbar, A. D., Severmann, S., Scott, C., and Gill, B. C.: Tracking Euxinia in the Ancient  
 1079 Ocean: A Multiproxy Perspective and Proterozoic Case Study, *Annual Review of Earth and Planetary*  
 1080 *Sciences*, 37, 507-534, 2009.  
 1081 Machida, H.: The stratigraphy, chronology and distribution of distal marker-tephras in and around  
 1082 Japan, *Global and Planetary Change*, 21, 71-94, 1999.  
 1083 Maithani, P. B. and Srinivasan, S.: Felsic Volcanic Rocks, a Potential Source of Uranium - An Indian  
 1084 Overview, *Energy Procedia*, 7, 163-168, 2011.  
 1085 Marchitto, T. M., Lehman, S. J., Ortiz, J. D., Flückiger, J., and van Geen, A.: Marine Radiocarbon  
 1086 Evidence for the Mechanism of Deglacial Atmospheric CO<sub>2</sub> Rise, *Science*, 316, 1456-1459, 2007.  
 1087 Marcott, S. A., Bauska, T. K., Buizert, C., Steig, E. J., Rosen, J. L., Cuffey, K. M., Fudge, T. J.,  
 1088 Severinghaus, J. P., Ahn, J., Kalk, M. L., McConnell, J. R., Sowers, T., Taylor, K. C., White, J. W. C.,  
 1089 and Brook, E. J.: Centennial-scale changes in the global carbon cycle during the last deglaciation,  
 1090 *Nature*, 514, 616-619, 2014.  
 1091 Matsumoto, K., Oba, T., Lynch-Stieglitz, J., and Yamamoto, H.: Interior hydrography and circulation of  
 1092 the glacial Pacific Ocean, *Quaternary Science Reviews*, 21, 1693-1704, 2002.  
 1093 Max, L., Lembke-Jene, L., Riethdorf, J. R., Tiedemann, R., Nurnberg, D., Kuhn, H., and Mackensen,  
 1094 A.: Pulses of enhanced North Pacific Intermediate Water ventilation from the Okhotsk Sea and Bering  
 1095 Sea during the last deglaciation, *Climate of the Past*, 10, 591-605, 2014.  
 1096 McManus, J., Berelson, W. M., Klinkhammer, G. P., Hammond, D. E., and Holm, C.: Authigenic  
 1097 uranium: Relationship to oxygen penetration depth and organic carbon rain, *Geochimica et*  
 1098 *Cosmochimica Acta*, 69, 95-108, 2005.  
 1099 McManus, J. F., Francois, R., Gherardi, J. M., Keigwin, L. D., and Brown-Leger, S.: Collapse and rapid  
 1100 resumption of Atlantic meridional circulation linked to deglacial climate changes, *Nature*, 428, 834-837,  
 1101 2004.  
 1102 Menviel, L., England, M. H., Meissner, K. J., Mouchet, A., and Yu, J.: Atlantic-Pacific seesaw and its  
 1103 role in outgassing CO<sub>2</sub> during Heinrich events, *Paleoceanography*, 29, 58-70, 2014.  
 1104 Moffitt, S. E., Moffitt, R. A., Sauthoff, W., Davis, C. V., Hewett, K., and Hill, T. M.: Paleoceanographic  
 1105 Insights on Recent Oxygen Minimum Zone Expansion: Lessons for Modern Oceanography, *PLOS*  
 1106 *ONE*, 10, e0115246, doi, 10.1371/journal.pone.0115246, 2015.  
 1107 Morford, J. L. and Emerson, S.: The geochemistry of redox sensitive trace metals in sediments,  
 1108 *Geochimica et Cosmochimica Acta*, 63, 1735-1750, 1999.  
 1109 Nakamura, H., Nishina, A., Liu, Z. J., Tanaka, F., Wimbush, M., and Park, J. H.: Intermediate and deep  
 1110 water formation in the Okinawa Trough, *Journal of Geophysical Research-Oceans*, 118, 6881-6893,  
 1111 2013.

1112 Nameroff, T. J., Balistrieri, L. S., and Murray, J. W.: Suboxic trace metal geochemistry in the Eastern  
 1113 Tropical North Pacific, *Geochimica et Cosmochimica Acta*, 66, 1139-1158, 2002.  
 1114 Nameroff, T. J., Calvert, S. E., and Murray, J. W.: Glacial-interglacial variability in the eastern tropical  
 1115 North Pacific oxygen minimum zone recorded by redox-sensitive trace metals, *Paleoceanography*, 19,  
 1116 PA1010, doi:10.1029/2003PA000912, 2004.  
 1117 Nishina, A., Nakamura, H., Park, J.-H., Hasegawa, D., Tanaka, Y., Seo, S., and Hibiya, T.: Deep  
 1118 ventilation in the Okinawa Trough induced by Kerama Gap overflow, *Journal of Geophysical Research:*  
 1119 *Oceans*, 121, 6092-6102, 2016.  
 1120 Ohkushi, K., Hara, N., Ikehara, M., Uchida, M., and Ahagon, N.: Intensification of North Pacific  
 1121 intermediate water ventilation during the Younger Dryas, *Geo-Mar Lett*, 36, 353-360, 2016.  
 1122 Ohkushi, K., Itaki, T., and Nemoto, N.: Last Glacial-Holocene change in intermediate-water ventilation  
 1123 in the Northwestern Pacific, *Quaternary Science Reviews*, 22, 1477-1484, 2003.  
 1124 Ohkushi, K., Kennett, J. P., Zeleski, C. M., Moffitt, S. E., Hill, T. M., Robert, C., Beaufort, L., and Behl,  
 1125 R. J.: Quantified intermediate water oxygenation history of the NE Pacific: A new benthic foraminiferal  
 1126 record from Santa Barbara basin, *Paleoceanography*, 28, 453-467, 2013.  
 1127 Okazaki, Y., Kimoto, K., Asahi, H., Sato, M., Nakamura, Y., and Harada, N.: Glacial to deglacial  
 1128 ventilation and productivity changes in the southern Okhotsk Sea, *Palaeogeography Palaeoclimatology*  
 1129 *Palaeoecology*, 395, 53-66, 2014.  
 1130 Okazaki, Y., Sagawa, T., Asahi, H., Horikawa, K., and Onodera, J.: Ventilation changes in the western  
 1131 North Pacific since the last glacial period, *Climate of the Past*, 8, 17-24, 2012.  
 1132 Okazaki, Y., Seki, O., Nakatsuka, T., Sakamoto, T., Ikehara, M., and Takahashi, K.: *Cycladophora*  
 1133 *davisiana* (Radiolaria) in the Okhotsk Sea: A key for reconstructing glacial ocean conditions, *Journal of*  
 1134 *Oceanography*, 62, 639-648, 2006.  
 1135 Okazaki, Y., Timmermann, A., Menviel, L., Harada, N., Abe-Ouchi, A., Chikamoto, M. O., Mouchet,  
 1136 A., and Asahi, H.: Deepwater Formation in the North Pacific During the Last Glacial Termination,  
 1137 *Science*, 329, 200-204, 2010.  
 1138 Okumura, Y. M., Deser, C., Hu, A., Timmermann, A., and Xie, S.-P.: North Pacific Climate Response to  
 1139 Freshwater Forcing in the Subarctic North Atlantic: Oceanic and Atmospheric Pathways, *Journal of*  
 1140 *Climate*, 22, 1424-1445, 2009.  
 1141 Porter, S. C. and Zhisheng, A.: Correlation between climate events in the North Atlantic and China  
 1142 during the last glaciation, *Nature*, 375, 305-308, 1995.  
 1143 Praetorius, S. K., Mix, A. C., Walczak, M. H., Wolhowe, M. D., Addison, J. A., and Prah, F. G.: North  
 1144 Pacific deglacial hypoxic events linked to abrupt ocean warming, *Nature*, 527, 362-366, 2015.  
 1145 Qu, T. and Lukas, R.: The Bifurcation of the North Equatorial Current in the Pacific, *Journal of*  
 1146 *Physical Oceanography*, 33, 5-18, 2003.  
 1147 Rühlemann, C., Müller, P. J., and Schneider, R. R.: Organic Carbon and Carbonate as Paleoproductivity  
 1148 Proxies: Examples from High and Low Productivity Areas of the Tropical Atlantic. In: *Use of Proxies*  
 1149 *in Paleoceanography: Examples from the South Atlantic*, Fischer, G. and Wefer, G. (Eds.), Springer  
 1150 Berlin Heidelberg, Berlin, Heidelberg, 1999.  
 1151 Rae, J. W. B., Sarnthein, M., Foster, G. L., Ridgwell, A., Grootes, P. M., and Elliott, T.: Deep water  
 1152 formation in the North Pacific and deglacial CO<sub>2</sub> rise, *Paleoceanography*, 29, 645-667, 2014.  
 1153 Reimer, P. J., Bard, E., Bayliss, A., Beck, J. W., Blackwell, P. G., Bronk Ramsey, C., Buck, C. E.,  
 1154 Cheng, H., Edwards, R. L., Friedrich, M., Grootes, P. M., Guilderson, T. P., Hafflidason, H., Hajdas, I.,  
 1155 Hatté, C., Heaton, T. J., Hoffmann, D. L., Hogg, A. G., Hughen, K. A., Kaiser, K. F., Kromer, B.,

1156 Manning, S. W., Niu, M., Reimer, R. W., Richards, D. A., Scott, E. M., Southon, J. R., Staff, R. A.,  
 1157 Turney, C. S. M., and van der Plicht, J.: IntCal13 and Marine13 Radiocarbon Age Calibration Curves  
 1158 0–50,000 Years cal BP, *Radiocarbon*, 55, 1869-1887, 2013.  
 1159 Rella, S. F., Tada, R., Nagashima, K., Ikehara, M., Itaki, T., Ohkushi, K., Sakamoto, T., Harada, N., and  
 1160 Uchida, M.: Abrupt changes of intermediate water properties on the northeastern slope of the Bering  
 1161 Sea during the last glacial and deglacial period, *Paleoceanography*, 27, PA3203,  
 1162 doi:3210.1029/2011pa002205, 2012.  
 1163 Riethdorf, J.-R., Max, L., Nuernberg, D., Lembke-Jene, L., and Tiedemann, R.: Deglacial development  
 1164 of (sub) sea surface temperature and salinity in the subarctic northwest Pacific: Implications for  
 1165 upper-ocean stratification, *Paleoceanography*, 28, doi:10.1002/palo.20014, 2013.  
 1166 Riethdorf, J.-R., Thibodeau, B., Ikehara, M., Nürnberg, D., Max, L., Tiedemann, R., and Yokoyama, Y.:  
 1167 Surface nitrate utilization in the Bering sea since 180ka BP: Insight from sedimentary nitrogen  
 1168 isotopes, *Deep Sea Research Part II: Topical Studies in Oceanography*, 125-126, 163-176, 2016.  
 1169 Rippert, N., Max, L., Mackensen, A., Cacho, I., Povea, P., and Tiedemann, R.: Alternating Influence of  
 1170 Northern Versus Southern-Sourced Water Masses on the Equatorial Pacific Subthermocline During the  
 1171 Past 240 ka, *Paleoceanography*, 32, 1256-1274, 2017.  
 1172 Rodríguez-Sanz, L., Mortyn, P. G., Herguera, J. C., and Zahn, R.: Hydrographic changes in the tropical  
 1173 and extratropical Pacific during the last deglaciation, *Paleoceanography*, 28, 529-538, 2013.  
 1174 Saenko, O. A., Schmittner, A., and Weaver, A. J.: The Atlantic-Pacific seesaw, *Journal of Climate*, 17,  
 1175 2033-2038, 2004.  
 1176 Sagawa, T. and Ikehara, K.: Intermediate water ventilation change in the subarctic northwest Pacific  
 1177 during the last deglaciation, *Geophysical Research Letters*, 35, 5, doi: 10.1029/2008gl035133, 2008.  
 1178 Scott, C. and Lyons, T. W.: Contrasting molybdenum cycling and isotopic properties in euxinic versus  
 1179 non-euxinic sediments and sedimentary rocks: Refining the paleoproxies, *Chemical Geology*, 324-325,  
 1180 19-27, 2012.  
 1181 Scott, C., Lyons, T. W., Bekker, A., Shen, Y., Poulton, S. W., Chu, X., and Anbar, A. D.: Tracing the  
 1182 stepwise oxygenation of the Proterozoic ocean, *Nature*, 452, 456-459, 2008.  
 1183 Shao, H., Yang, S., Cai, F., Li, C., Liang, J., Li, Q., Hyun, S., Kao, S.-J., Dou, Y., Hu, B., Dong, G., and  
 1184 Wang, F.: Sources and burial of organic carbon in the middle Okinawa Trough during late Quaternary  
 1185 paleoenvironmental change, *Deep Sea Research Part I: Oceanographic Research Papers*, 118, 46-56,  
 1186 2016.  
 1187 Shcherbina, A. Y., Talley, L. D., and Rudnick, D. L.: Direct observations of North Pacific ventilation:  
 1188 Brine rejection in the Okhotsk Sea, *Science*, 302, 1952-1955, 2003.  
 1189 Shi, X., Wu, Y., Zou, J., Liu, Y., Ge, S., Zhao, M., Liu, J., Zhu, A., Meng, X., Yao, Z., and Han, Y.:  
 1190 Multiproxy reconstruction for Kuroshio responses to northern hemispheric oceanic climate and the  
 1191 Asian Monsoon since Marine Isotope Stage 5.1 (~88 ka), *Climate of the Past*, 10, 1735-1750, 2014.  
 1192 Shibahara, A., Ohkushi, K., Kennett, J. P., and Ikehara, K.: Late Quaternary changes in intermediate  
 1193 water oxygenation and oxygen minimum zone, northern Japan: A benthic foraminiferal perspective,  
 1194 *Paleoceanography*, 22, PA3213, doi:3210.1029/2005pa001234, 2007.  
 1195 Shimmiel, G. B. and Price, N. B.: The behaviour of molybdenum and manganese during early  
 1196 sediment diagenesis — offshore Baja California, Mexico, *Marine Chemistry*, 19, 261-280, 1986.  
 1197 Sibuet, J. C., Letouzey, J., Barbier, F., Charvet, J., Foucher, J. P., Hilde, T. W. C., Kimura, M., Chiao,  
 1198 L.-Y., Marsset, B., Muller, C., and Stéphan, J. F.: Back Arc Extension in the Okinawa Trough, *Journal*  
 1199 *of Geophysical Research: Solid Earth*, 92, 14041-14063, 1987.

1200 Sigman, D. M. and Boyle, E. A.: Glacial/interglacial variations in atmospheric carbon dioxide, *Nature*,  
 1201 407, 859-869, 2000.  
 1202 Spratt, R. M. and Lisiecki, L. E.: A Late Pleistocene sea level stack, *Clim. Past*, 12, 1079-1092, 2016.  
 1203 Sun, Y., Clemens, S. C., Morrill, C., Lin, X., Wang, X., and An, Z.: Influence of Atlantic meridional  
 1204 overturning circulation on the East Asian winter monsoon, *Nature Geosci*, 5, 46-49, 2012.  
 1205 Sun, Y. B., Oppo, D. W., Xiang, R., Liu, W. G., and Gao, S.: Last deglaciation in the Okinawa Trough:  
 1206 Subtropical northwest Pacific link to Northern Hemisphere and tropical climate, *Paleoceanography*, 20,  
 1207 PA4005, doi:4010.1029/2004pa001061, 2005.  
 1208 Sundby, B., Martinez, P., and Gobeil, C.: Comparative geochemistry of cadmium, rhenium, uranium,  
 1209 and molybdenum in continental margin sediments, *Geochimica et Cosmochimica Acta*, 68, 2485-2493,  
 1210 2004.  
 1211 Talley, L. D.: Distribution foramtion of North Pacific Intermediate water, *Journal of Physical*  
 1212 *Oceanography*, 23, 517-537, 1993.  
 1213 Talley, L. D.: Hydrographic Atlas of the World Ocean Circulation Experiment (WOCE). In: Volume 2:  
 1214 Pacific Ocean, Sparrow, M., Chapman, P., and Gould, J. (Eds.), International WOCE Project Office,  
 1215 Southampton, UK, 2007.  
 1216 Tribouvillard, N., Algeo, T. J., Lyons, T., and Riboulleau, A.: Trace metals as paleoredox and  
 1217 paleoproductivity proxies: An update, *Chemical Geology*, 232, 12-32, 2006.  
 1218 Ujiie, H. and Ujiie, Y.: Late Quaternary course changes of the Kuroshio Current in the Ryukyu Arc  
 1219 region, northwestern Pacific Ocean, *Marine Micropaleontology*, 37, 23-40, 1999.  
 1220 Ujiie, Y., Asahi, H., Sagawa, T., and Bassinot, F.: Evolution of the North Pacific Subtropical Gyre  
 1221 during the past 190 kyr through the interaction of the Kuroshio Current with the surface and  
 1222 intermediate waters, *Paleoceanography*, 31, 1498-1513, 2016.  
 1223 Ujiie, Y., Ujiie, H., Taira, A., Nakamura, T., and Oguri, K.: Spatial and temporal variability of surface  
 1224 water in the Kuroshio source region, Pacific Ocean, over the past 21,000 years: evidence from  
 1225 planktonic foraminifera, *Marine Micropaleontology*, 49, 335-364, 2003.  
 1226 Vorlicek, T. P. and Helz, G. R.: Catalysis by mineral surfaces: Implications for Mo geochemistry in  
 1227 anoxic environments, *Geochimica et Cosmochimica Acta*, 66, 3679-3692, 2002.  
 1228 Wahyudi and Minagawa, M.: Response of benthic foraminifera to organic carbon accumulation rates in  
 1229 the Okinawa Trough, *Journal of Oceanography*, 53, 411-420, 1997.  
 1230 Wan, S. and Jian, Z.: Deep water exchanges between the South China Sea and the Pacific since the last  
 1231 glacial period, *Paleoceanography*, 29, 1162-1178, 2014.  
 1232 Wang, Y., Cheng, H., Edwards, R. L., He, Y., Kong, X., An, Z., Wu, J., Kelly, M. J., Dykoski, C. A.,  
 1233 and Li, X.: The Holocene Asian Monsoon: Links to Solar Changes and North Atlantic Climate, *Science*,  
 1234 308, 854-857, 2005.  
 1235 Wu, Y., Cheng, Z., and Shi, X.: Stratigraphic and carbonate sediment characteristics of Core CSH1  
 1236 from the northern Okinawa Trough, *Advances in Marine Science*, 22, 163-169 (in Chinese with English  
 1237 Abstract), 2004.  
 1238 Wu, Y., Shi, X., Zou, J., Cheng, Z., Wang, K., Ge, S., and Shi, F.: Benthic foraminiferal  $\delta^{13}\text{C}$   
 1239 minimum events in the southeastern Okhotsk Sea over the last 180ka, *Chinese Science Bulletin*, 59,  
 1240 3066-3074, 2014.  
 1241 You, Y. Z.: The pathway and circulation of North Pacific Intermediate Water, *Geophysical Research*  
 1242 *Letters*, 30, doi:10.1029/2003gl018561, 2003.  
 1243 You, Y. Z., Suginoara, N., Fukasawa, M., Yasuda, I., Kaneko, I., Yoritaka, H., and Kawamiya, M.:

1244 Roles of the Okhotsk Sea and Gulf of Alaska in forming the North Pacific Intermediate Water, *Journal*  
1245 *of Geophysical Research-Oceans*, 105, 3253-3280, 2000.

1246 You, Y. Z., Sugimotohara, N., Fukasawa, M., Yoritaka, H., Mizuno, K., Kashino, Y., and Hartoyo, D.:  
1247 Transport of North Pacific Intermediate Water across Japanese WOCE sections, *Journal of Geophysical*  
1248 *Research-Oceans*, 108, doi: 10.1029/2002jc001662, 2003.

1249 Yu, H., Liu, Z. X., Berne, S., Jia, G. D., Xiong, Y. Q., Dickens, G. R., Wei, G. J., Shi, X. F., Liu, J. P.,  
1250 and Chen, F. J.: Variations in temperature and salinity of the surface water above the middle Okinawa  
1251 Trough during the past 37 kyr, *Palaeogeography Palaeoclimatology Palaeoecology*, 281, 154-164,  
1252 2009.

1253 Zhang, X., Knorr, G., Lohmann, G., and Barker, S.: Abrupt North Atlantic circulation changes in  
1254 response to gradual CO<sub>2</sub> forcing in a glacial climate state, *Nature Geoscience*, 10, 518-524, 2017.

1255 Zheng, X., Kao, S., Chen, Z., Menviel, L., Chen, H., Du, Y., Wan, S., Yan, H., Liu, Z., Zheng, L., Wang,  
1256 S., Li, D., and Zhang, X.: Deepwater circulation variation in the South China Sea since the Last Glacial  
1257 Maximum, *Geophysical Research Letters*, 43, 8590-8599, 2016.

1258 Zheng, Y., Anderson, R., van Geen, A., and Fleisher, M.: Remobilization of authigenic uranium in  
1259 marine sediments by bioturbation, *Geochimica et Cosmochimica Acta*, 66, 1759-1772, 2002.

1260 Zheng, Y., Anderson, R., van Geen, A., and Kuwabara, J.: Authigenic molybdenum formation in marine  
1261 sediments: a link to pore water sulfide in the Santa Barbara Basin, *Geochimica et Cosmochimica Acta*,  
1262 64, 4165-4178, 2000.

1263 Zhu, A., Shi, X., Zou, J., Wu, Y., Zhang, H., and Bai, Y.: Sediment Provenance and Fluxes in the  
1264 Northern Okinawa Trough During the last 88ka, *Marine Geology & Quaternary Geology*, 35, 1-8 (in  
1265 Chinese with English Abstract), 2015.

1266 Zou, J., Shi, X., Liu, Y., Liu, J., Selvaraj, K., and Kao, S.-J.: Reconstruction of environmental changes  
1267 using a multi-proxy approach in the Ulleung Basin (Sea of Japan) over the last 48 ka, *Journal of*  
1268 *Quaternary Science*, 27, 891-900, 2012.

1269



## Captions

**Table 1.** Locations of different sediment core records and their source references discussed in the text.

**Table 2.** Age control points adopted between planktic foraminifera species *Globigerinoides ruber*  $\delta^{18}\text{O}$  of Core CSH1 and Chinese stalagmite  $\delta^{18}\text{O}$  (Cheng et al., 2016) for tuning the age model between 10 ka and 60 ka in this study. A linear interpolation was assumed between age control points.

**Figure 1.** (a) Spatial distribution of dissolved oxygen content at 700 m water depth in the North Pacific. Black arrows denote simplified Kuroshio and Oyashio circulations and North Pacific Intermediate Water (NPIW) in the North Pacific. The red thick dashed line indicates transformation of Okhotsk Sea Intermediate Water (OSIW) by cabbeling the subtropical NPIW along the subarctic-tropical frontal zone (You, 2003). The light brown solid line with arrow indicates the spreading path of subtropical NPIW from northeast North Pacific southward toward the low-latitude northwest North Pacific (You, 2003). Yellow solid lines with arrow represent two passages through which NPIW enter into the Okinawa Trough. This figure was created with Ocean Data View (odv.awi.de). (b) Location of sediment core CSH1 investigated in this study (red diamond). Also shown are locations of sediment cores PN-3, E017, 255 and MD012404 investigated previously from the Okinawa Trough, GH08-2004 from the East of Ryukyu Island, GH02-1030 off ~~-(PN-3, E017, 255 and MD012404; white cross-line), the east of Japan~~ ~~northern and southern Japan (GH08-2004 and GH02-1030), PC-23A from~~ the Bering Sea ~~(PC-23A)~~ and ODP167-1017 from the northeastern Pacific ~~(ODP167-1017)~~. Letters A to E represent the sediment cores from and near the OT. The detailed information for these cores ~~can be shown seen~~ in Table 1.

**Figure 2.** Spatial distribution of sea surface salinity in the East China Sea. (a) summer (July to September); (b) winter (January to March). Lower sea surface salinity in

带格式的：两端对齐

带格式的：字体：倾斜

域代码已更改

域代码已更改

summer relative to that of winter indicates strong effects of summer East Asian Monsoon.

**Figure 3.** (a) Lithology and oxygen isotope ( $\delta^{18}\text{O}$ ) profile of planktic foraminifera species *Globigerinoides ruber* (*G. ruber*) in core CSH1. (b) Plot of ages versus depth for core CSH1. Three known ash layers are indicated by solid red rectangles. (c) Time series of linear sedimentation rate (LSR) from core CSH1. (d) Comparison of age model of core CSH1 with Chinese Stalagmite composite  $\delta^{18}\text{O}$  curve of (Cheng et al., 2016). Tie points for CSH1 core chronology (Table 2) in Figures 2b-3c and 2e-3d are designated by blue and red solid colored dots/crosses.

**Figure 4.** Age versus (a)  $\text{CaCO}_3$  concentration, linear sedimentation rate (LSR), (b) Total nitrogen (TN) concentration, C/N molar ratio, (c) Total organic carbon (TOC) concentration, (d) C/N molar ratio, Total nitrogen (TN) concentration, (e) linear sedimentation rate (LSR),  $\text{CaCO}_3$  concentration, (f) Al concentration, (g) Mn concentration, (h) Mo/Mn ratio, (i) Mo concentration, (j) excess Mo concentration, (k) U concentration and (l) excess U concentration and (m)  $(\text{Mo}/\text{U})_{\text{excess}}$  ratio in core CSH1. Light gray and dark gray/Gray and black vertical bars indicate different sediment intervals in core CSH1. MIS indicates Marine Isotope Stage. 8.2 ka, PB, YD, B/A, HS1, LGM and HS2 refer to 8,200 year cold event, Preboreal, Younger Dryas, Bölling - Alleröd, Heinrich Stadial 1, Last Glacial Maximum and Heinrich Stadial 2, respectively, which were identified in core CSH1. Blue solid diamonds in Figure 3l and 4m indicate the age control points.

**Figure 5.** Scatter plots of  $\text{Mo}_{\text{excess}}$  vs Mn concentrations and  $\text{U}_{\text{excess}}$  concentration vs Mo/Mn ratio at different time intervals in core CSH1. A various correlation is present in core CSH1 at different time intervals, which shows their complicated geochemical behaviors (Figs. 5a and 5b). Strong positive correlation between  $\text{U}_{\text{excess}}$  concentration and Mo/Mn ratio and  $\text{U}_{\text{excess}}$  concentration (Fig. 5c) suggest that Mo/Mn ratio they are is a reliable proxy suitable to track sedimentary redox conditions in the geological

域代码已更改

带格式的：字体：五号

带格式的：下标

1330 past.

1331

1332 **Figure 6.** Proxy-related reconstructions of ~~intermediate-water~~mid-depth sedimentary  
1333 oxygenation at site CSH1 (this study) compared with oxygenation records from other  
1334 locations of the North Pacific and published climatic and environmental records from  
1335 the Okinawa Trough. From top to bottom: (a)  $\text{CaCO}_3$  concentration, (b)  $U_{\text{excess}}$   
1336 concentration, (c) Mo/Mn ratio, and (d) ~~Mn concentration~~sea surface temperature  
1337 (SST-) (Shi et al., 2014), ~~and~~ (e) abundance of *P.obliquiloculata* in core CSH1 (Shi et  
1338 al., 2014) ~~and~~ (f) bulk sedimentary organic matter  $\delta^{15}\text{N}$  ~~of TOC~~ in core MD01-2404  
1339 (Kao et al., 2008), (g)  $\delta^{13}\text{C}$  of epibenthic foraminiferal *C.wuellerstorfi* in core PN-3  
1340 (Wahyudi and Minagawa, 1997), (h) relative abundance of *B. aculeata* (hypoxia-like  
1341 species) and (i) *C. hyaline* (oxygen-like species) (Li et al., 2005), (hj) Dysoxic  
1342 dysoxic taxa (%) in core ODP 167-1017 in the northeastern Pacific (Cannariato and  
1343 Kennett, 1999) and ~~(ik)~~  $\delta^{13}\text{C}$  of benthic foraminiferal *Uvigerina akitaensis* in core  
1344 PC23A in the Bering Sea (Rella et al., 2012). Light gray ~~Gray~~ and dark gray ~~black~~  
1345 vertical bars are the same as those in Figure 4.

1346

1347 **Figure 7.** Proxy records favoring the existence of out-of-phase connections ~~oceanic~~  
1348 ~~ventilation seesaw~~ between the subtropical North Pacific and North Atlantic during  
1349 the last deglaciation and enhanced carbon storage at mid-depth waters. (a)  $U_{\text{excess}}$   
1350 concentration in core CSH1; Atmospheric  $\text{CO}_2$  concentration (Marcott et al., 2014) (b)  
1351 Mo/Mn ratio in core CSH1; Indicator of strength of Atlantic Meridional Ocean  
1352 Circulation ( $^{231}\text{Pa}/^{230}\text{Th}$ ) (Böhm et al., 2015; McManus et al., 2004); (c) benthic  $\delta^{13}\text{C}$   
1353 record in core PC-23A in the Bering Sea (Rella et al., 2012); (d) Indicator of strength  
1354 of Atlantic Meridional Ocean Circulation ( $^{231}\text{Pa}/^{230}\text{Th}$ ) (Böhm et al., 2015; McManus  
1355 et al., 2004); Mo/Mn ratio in core CSH1; (e) Atmospheric  $\text{CO}_2$  concentration (Marcott  
1356 et al., 2014)  $U_{\text{excess}}$  concentration in core CH1. Light gray and dark gray vertical bars  
1357 are the same as those in Figure 4. ~~Blue diamonds are the same as those in Figure 3.~~

1358

域代码已更改

域代码已更改

带格式的：字体：倾斜

域代码已更改

带格式的：字体：倾斜

域代码已更改

Table 1

| Label in<br>Figure 1b | Station     | Latitude_(°N) | Longitude_(°E) | Water depth (m) | Area                     | Reference                         |
|-----------------------|-------------|---------------|----------------|-----------------|--------------------------|-----------------------------------|
| A                     | CSH1        | 31.23         | 128.72         | 703             | Okinawa Trough           | this study                        |
|                       | PN-3        | 28.10         | 127.34         | 1058            | Okinawa Trough           | Wahyudi and Minagawa,<br>(1997)   |
|                       | B           | MD012404      | 26.65          | 125.81          | Okinawa Trough           | Kao et al., (2008)                |
|                       | C           | E017          | 26.57          | 126.02          | Okinawa Trough           | Li et al., (2005)                 |
|                       | D           | 255           | 25.20          | 123.12          | Okinawa Trough           | Jian et al., (1996)               |
| E                     | GH08-2004   | 26.21         | 127.09         | 1166            | East of Ryukyu<br>Island | Kubota et al. (20102015)          |
|                       | GH02-1030   | 42.23         | 144.21         | 1212            | Off Japan                | Sagawa and Ikehara,<br>(2008)     |
|                       | PC-23A      | 60.16         | 179.46         | 1002            | Bering Sea               | Rella et al.,(2012)               |
|                       | ODP167-1017 | 34.54         | 239.11         | 955             | NE Pacific               | Cannariato and Kennett,<br>(1999) |

带格式的：两端对齐

带格式的：居中

带格式表格

带格式的：两端对齐

带格式的：段落间距段前：0 磅，段后：0 磅，行距：单倍行距，与下段不同页，段中分页

带格式的：居中

带格式表格

带格式的：居中

带格式的：居中

带格式的：居中

带格式的：居中

带格式的：段落间距段前：0 磅，段后：0 磅，行距：单倍行距，与下段不同页，段中分页

带格式的：段落间距段前：0 磅，段后：0 磅，行距：单倍行距，与下段不同页，段中分页

带格式的：到齐到网格，制表位：不在 19.78 字符 + 39.55 字符

带格式的：段落间距段前：0 磅，段后：0 磅，行距：单倍行距，与下段不同页，段中分页

1  
2  
  
  
3  
4  
5

Table 2

| Depth(cm) | AMS <sup>14</sup> C (yr) | Error (yr) | Calibrated Age (yr) | Tie Point Type   | LSR (cm/ka) | Source             |
|-----------|--------------------------|------------|---------------------|------------------|-------------|--------------------|
| 10        | 3420                     | ±35        | 3296                | <sup>14</sup> C  |             | Shi et al., (2014) |
| 106       | 7060                     | ± 40       | 7545                | <sup>14</sup> C  | 22.59       | Shi et al., (2014) |
| 218       |                          |            | 12352               | Stalagmite, YD   | 23.30       | This study         |
| 322       |                          |            | 16029               | Stalagmite, H1   | 28.28       | This study         |
| 362       |                          |            | 19838               | Stalagmite       | 10.50       | This study         |
| 466       |                          |            | 23476               | Stalagmite, DO2  | 28.59       | This study         |
| 506       |                          |            | 24163               | Stalagmite, H2   | 58.2233.29  | This study         |
| 698       |                          |            | 28963               | Stalagmite, DO4  | 40.00       | This study         |
| 746       |                          |            | 29995               | Stalagmite, H3   | 46.51       | This study         |
| 834       |                          |            | 32442               | Stalagmite, DO5  | 3539.0996   | This study         |
| 938       |                          |            | 37526               | Stalagmite, DO8  | 20.46       | This study         |
| 978       |                          |            | 39468               | Stalagmite, H4   | 20.60       | This study         |
| 1058      |                          |            | 46151               | Stalagmite, DO12 | 11.97       | This study         |
| 1122      |                          |            | 49432               | Stalagmite, DO13 | 19.51       | This study         |
| 1242      |                          |            | 52831               | Stalagmite, DO14 | 35.30       | This study         |
| 1282      |                          |            | 57241               | Stalagmite, DO16 | 9.07        | This study         |
| 1346      |                          |            | 61007               | Stalagmite, H6   | 16.99       | This study         |
| 1530      |                          | ±2590      | 73910               | MIS4/5           | 14.26       | Shi et al., (2014) |
| 1610      |                          | ±3580      | 79250               | MIS 5.1          | 14.98       | Shi et al., (2014) |

- 带格式的 ... [1]
- 带格式的 ... [2]
- 带格式的 ... [3]
- 带格式的 ... [4]
- 带格式的 ... [5]
- 带格式的 ... [6]
- 带格式的 ... [7]
- 带格式的 ... [8]
- 带格式的 ... [9]
- 带格式的 ... [10]
- 带格式的 ... [11]
- 带格式的 ... [12]
- 带格式的 ... [13]
- 带格式的 ... [14]
- 带格式的 ... [15]
- 带格式的 ... [16]
- 带格式的 ... [17]
- 带格式的 ... [18]
- 带格式的 ... [19]
- 带格式的 ... [20]
- 带格式的 ... [21]
- 带格式的 ... [22]
- 带格式的 ... [23]
- 带格式的 ... [24]
- 带格式的 ... [25]
- 带格式的 ... [26]
- 带格式的 ... [27]
- 带格式的 ... [28]
- 带格式的 ... [29]
- 带格式的 ... [30]
- 带格式的 ... [31]
- 带格式的 ... [32]
- 带格式的 ... [33]
- 带格式的 ... [34]
- 带格式的 ... [35]
- 带格式的 ... [36]
- 带格式的 ... [37]
- 带格式的 ... [38]
- 带格式的 ... [39]
- 带格式的 ... [40]
- 带格式的 ... [41]
- 带格式的 ... [42]
- 带格式的 ... [43]
- 带格式的 ... [44]
- 带格式的 ... [45]
- 带格式的 ... [46]
- 带格式的 ... [47]
- 带格式的 ... [48]
- 带格式的 ... [49]
- 带格式的 ... [50]
- 带格式的 ... [51]
- 带格式的 ... [52]
- 带格式的 ... [53]

6 Fig.1

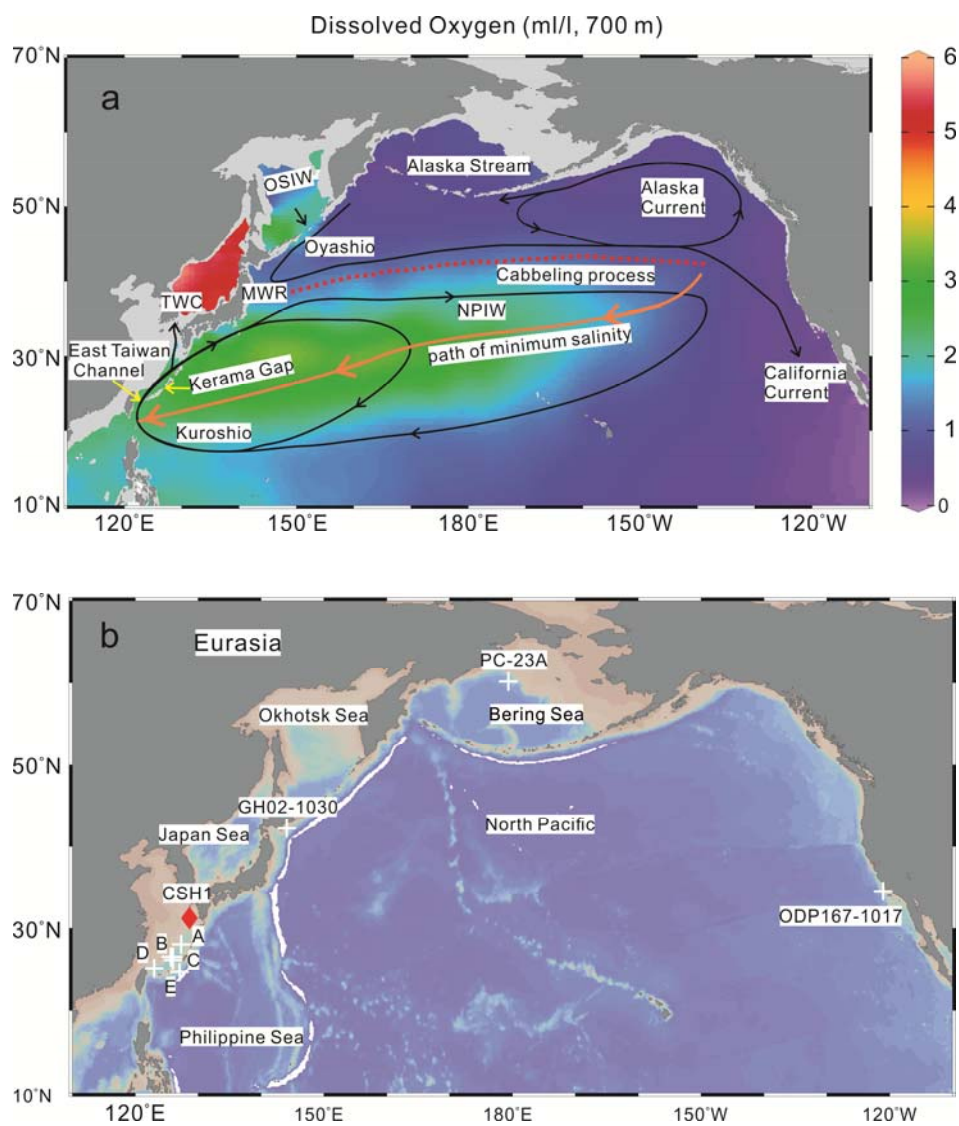

9

10

11

Fig.2

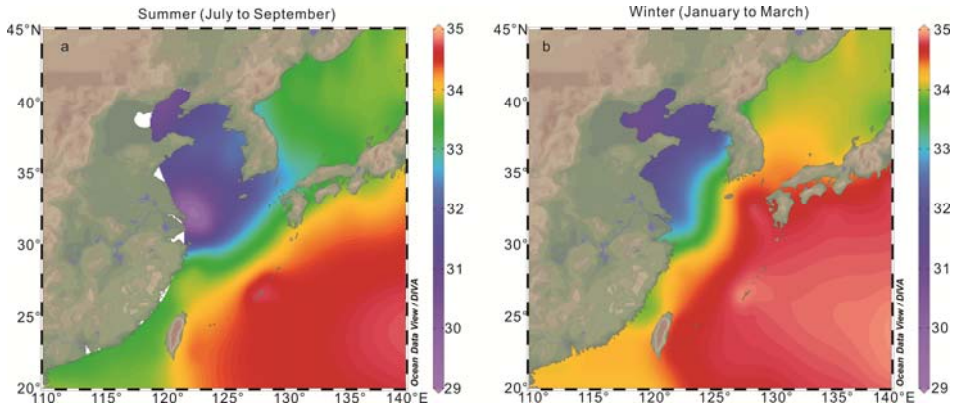

Fig.3

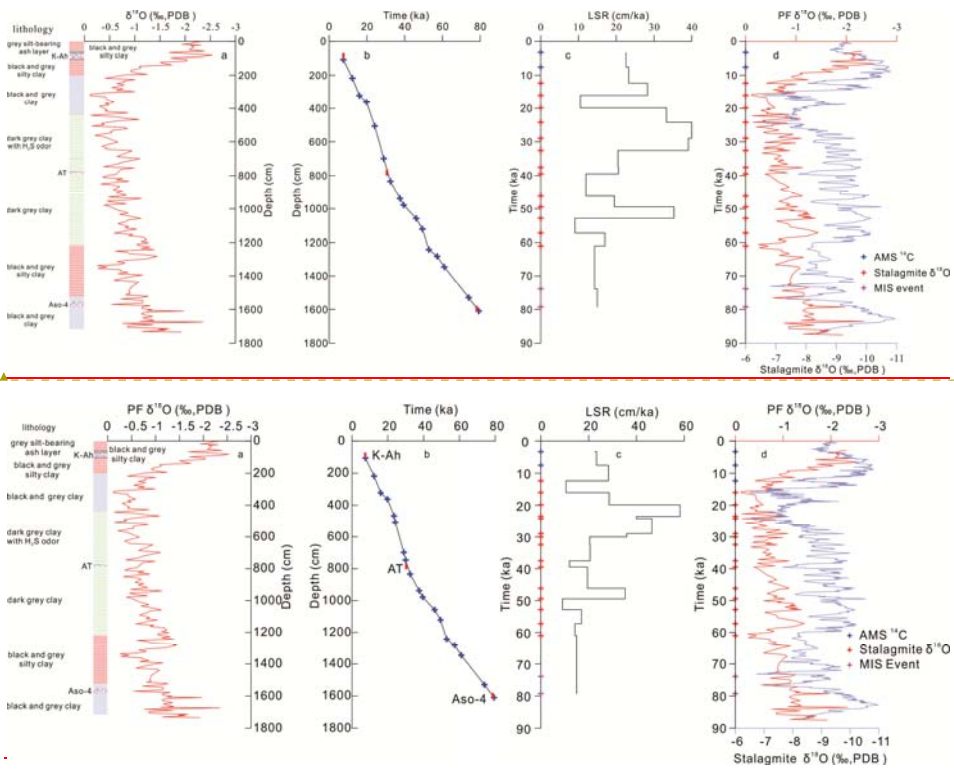

带格式的：字体：小四



Fig.4

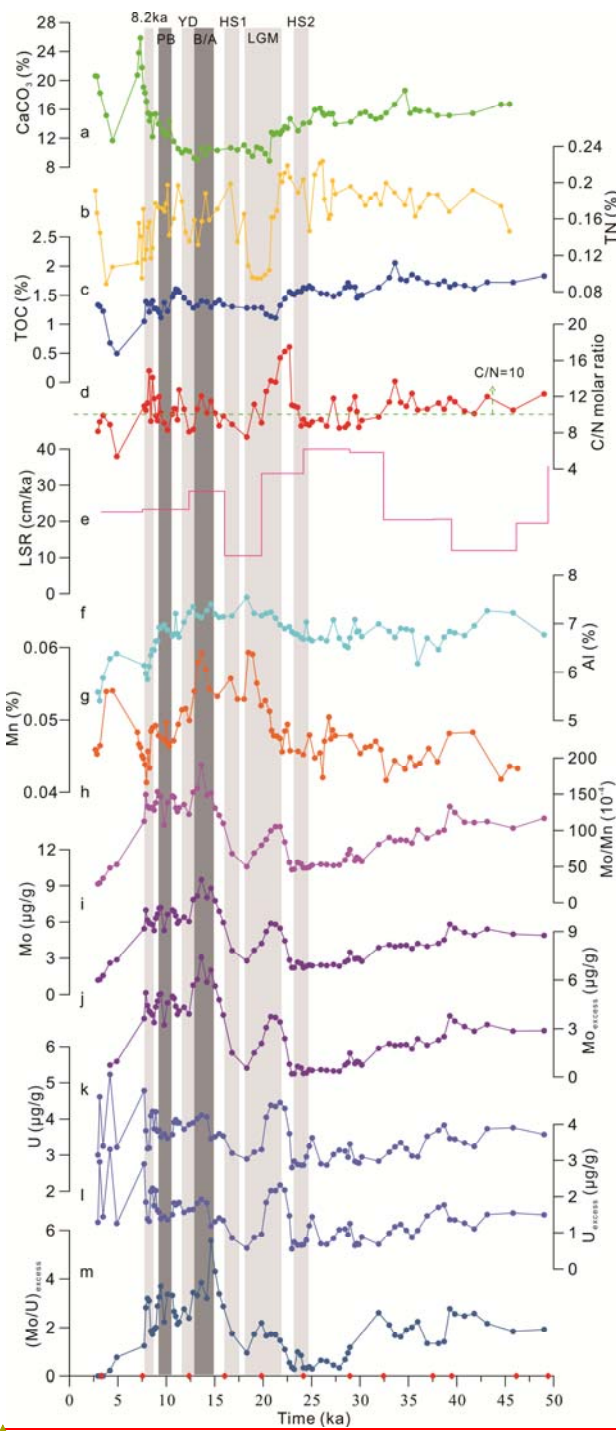

带格式的: 字体: 小四



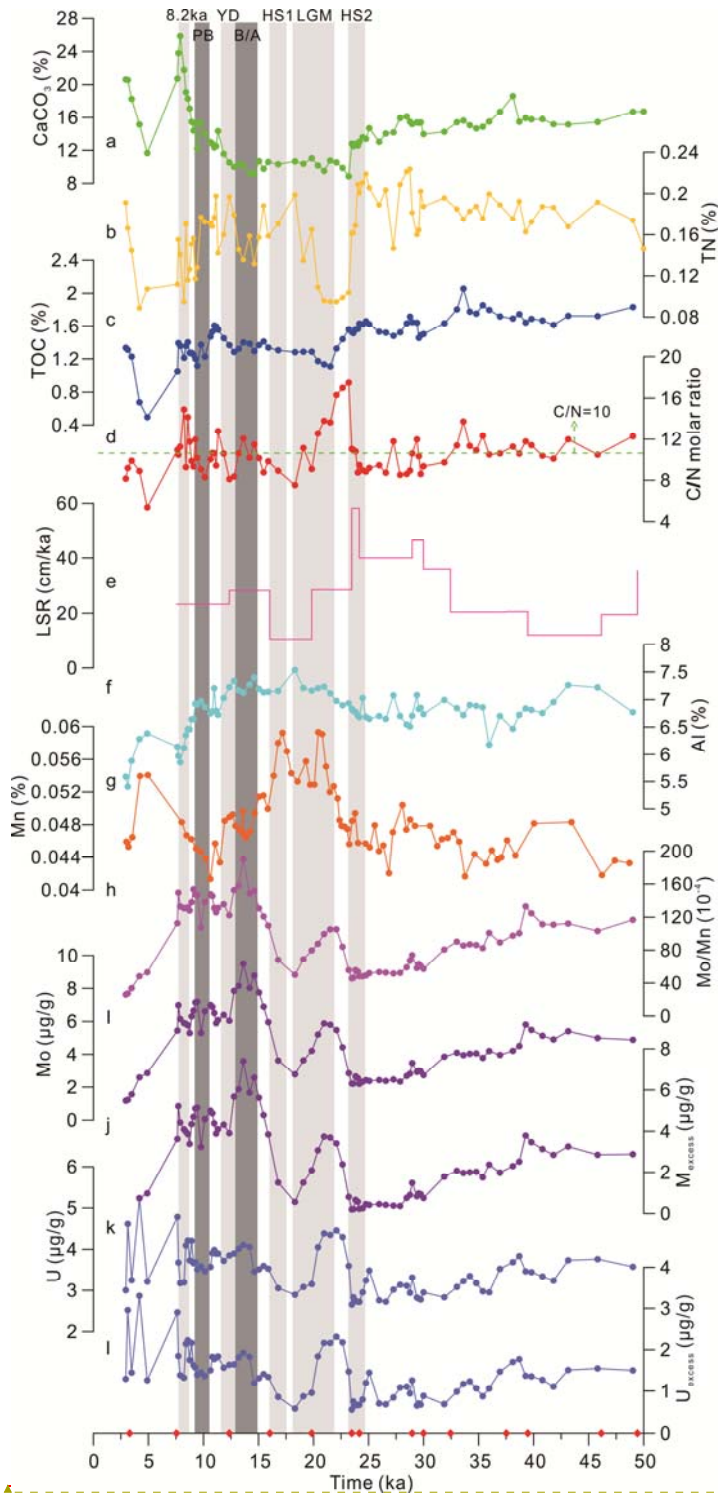

带格式的: 字体: 小四

Fig.5

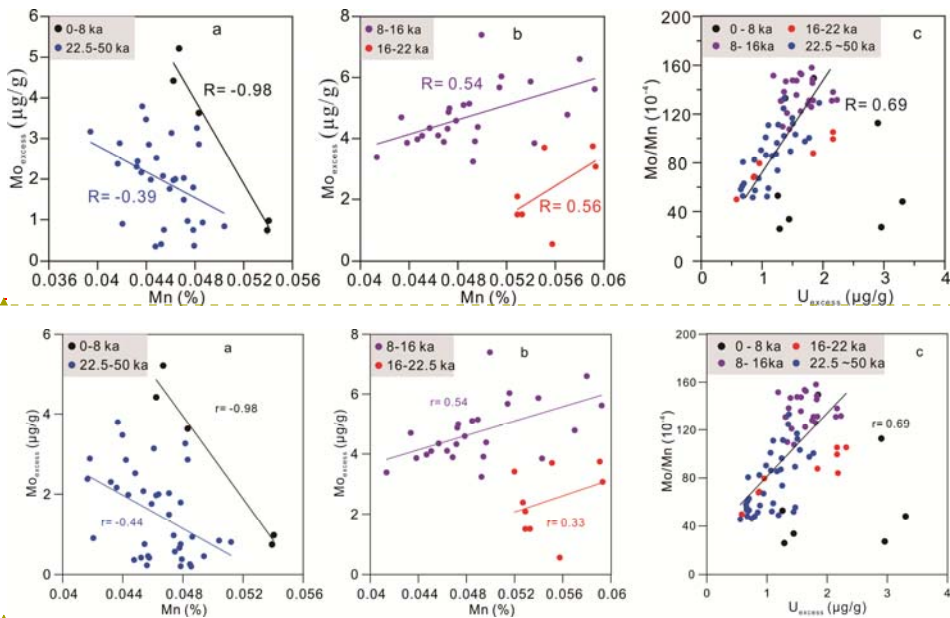

带格式的：字体：小四

带格式的：字体：小四

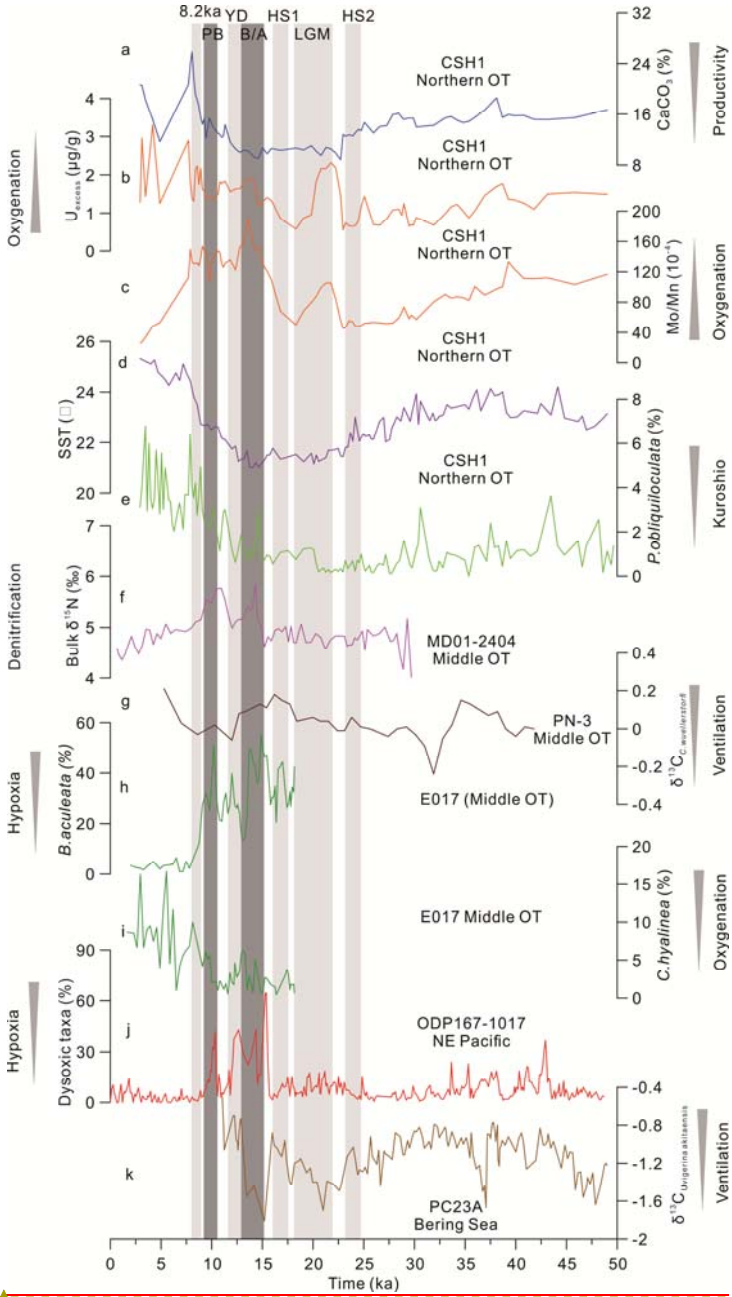

带格式的: 字体: 小四

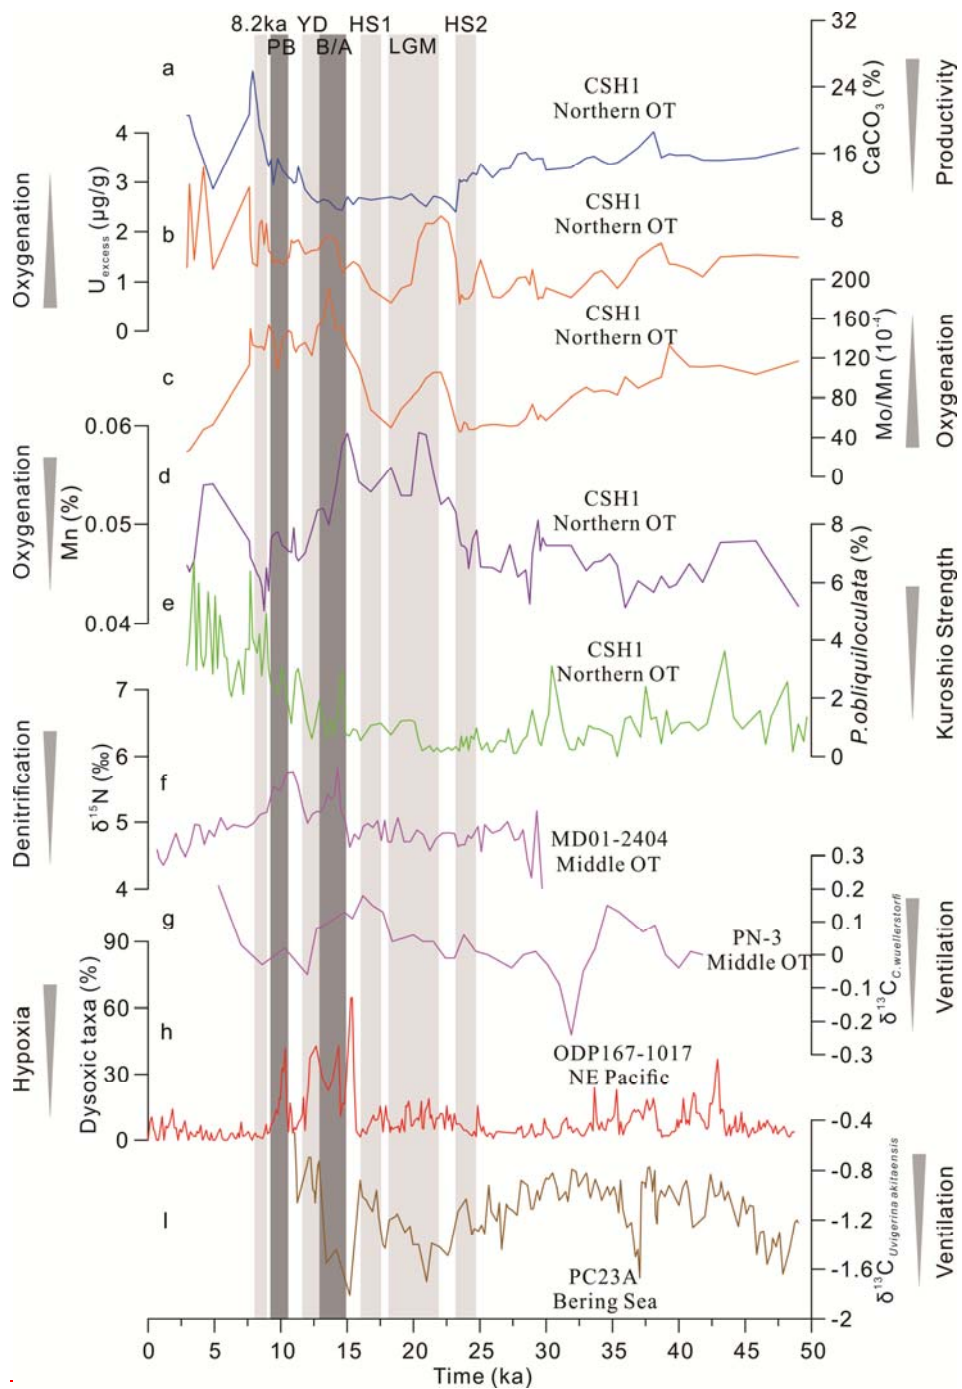

31

32

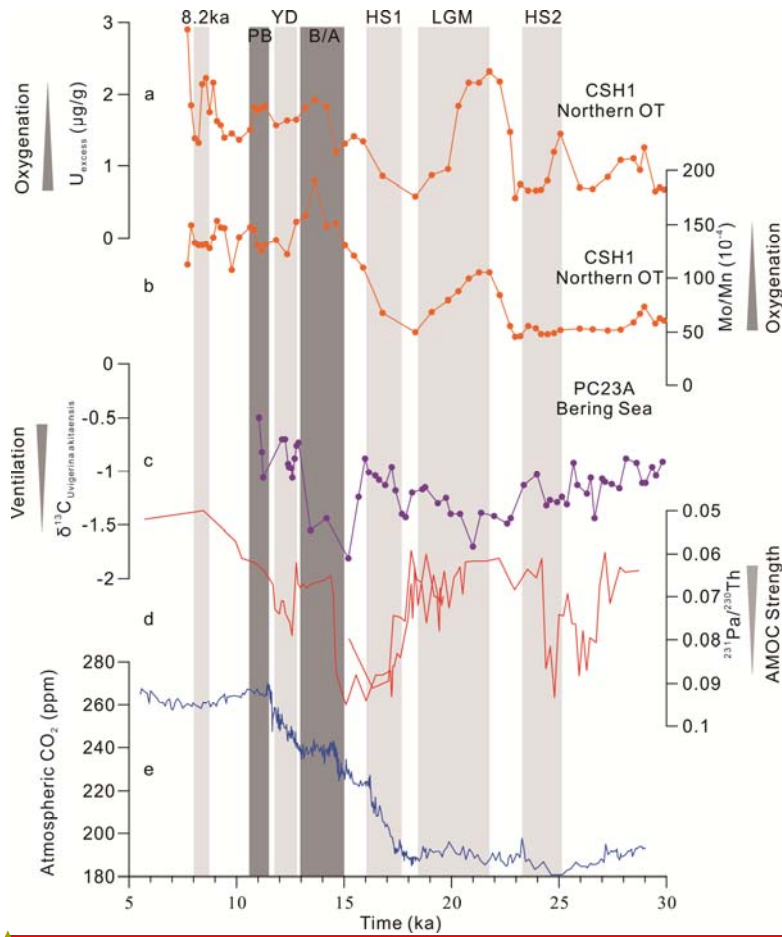

带格式的: 字体: 小四

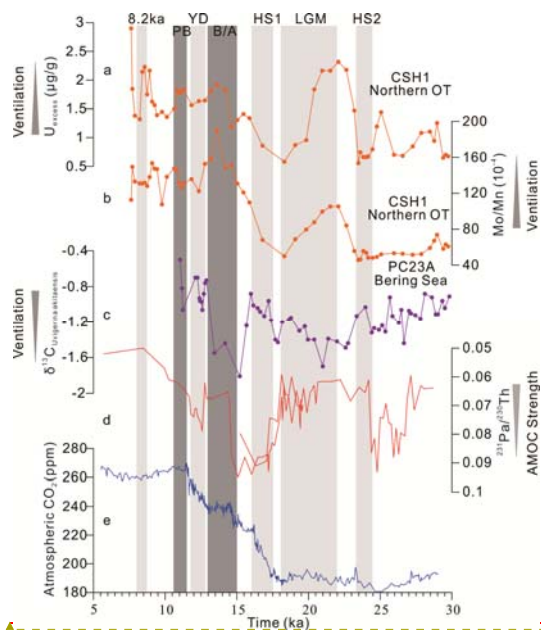

带格式的: 字体: 小四
